1 **Short title:** *SELF-PRUNING* regulates auxin responses in tomato

2 **Corresponding author details:**

3 Agustin Zsögön

4 Universidade Federal de Viçosa, Brazil

5 Phone: +55 31 3899 2592

6 Fax: +55 31 3899 4139

7 agustin.zsogon@ufv.br

8

9 **Title:** *SELF-PRUNING* affects auxin responses synergistically with the cyclophilin A  
10 **DIAGEOTROPICA** in tomato

11 **Authors:** Willian B. Silva<sup>1a</sup>, Mateus H. Vicente<sup>2a</sup>, Jessenia M. Robledo<sup>1a</sup>, Diego S.  
12 Reartes<sup>2</sup>, Renata C. Ferrari<sup>4</sup>, Ricardo Bianchetti<sup>4</sup>, Wagner L. Araújo<sup>3</sup>, Luciano  
13 Freschi<sup>4</sup>, Lázaro E. P. Peres<sup>2</sup>, Agustín Zsögön<sup>1\*</sup>

14 **Affiliations**

15 <sup>1</sup>*Departamento de Biologia Vegetal, Universidade Federal de Viçosa, CEP 36570-900,*  
16 *Viçosa, MG, Brazil*

17 <sup>2</sup>*Laboratory of Hormonal Control of Plant Development. Departamento de Ciências*  
18 *Biológicas, Escola Superior de Agricultura "Luiz de Queiroz", Universidade de São Paulo,*  
19 *CP 09, 13418-900, Piracicaba, SP, Brazil*

20 <sup>3</sup>*Max-Planck Partner group at the Departamento de Biologia Vegetal, Universidade*  
21 *Federal de Viçosa, 36570-900, Viçosa, MG, Brazil.*

22

23 <sup>4</sup>*Instituto de Biociências, Universidade de São Paulo, CEP 05508-900, São Paulo, SP,*  
24 *Brazil*

25 <sup>a</sup>These authors contributed equally

26

27 WBS, williambatistadasilva@gmail.com

28 MHV, mhvicente21@gmail.com

29 JMR, kjmoncaleano@gmail.com

30 DSR, diego.reartes@gmail.com

31 RCF, renata.callefe@gmail.com

32 RB, bianchetti.ricardo@gmail.com

33 WLA, wlaraujo@ufv.br

34 LF, freschi@usp.br

35 LEPP, lazaro.peres@usp.br

36

37 **Summary:** The antiflorigenic signal SELF-PRUNING, which controls growth habit, exerts  
38 its effects through auxin transport, signaling and metabolism in tomato.

39

#### 40 **Author contributions**

41 WBS, MHV and JMR generated the plant material and conducted experiments. WBS,  
42 MHV, JMR, DSR, LF, RCF and RB conducted experiments and prepared figures and/or  
43 tables. LF and WLA designed experiments, contributed reagents/materials/analysis tools  
44 and reviewed drafts of the paper. AZ and LEPP conceived and designed the experiments,  
45 analyzed the data and wrote the paper.

46 **Corresponding author:** AZ, agustin.zsogon@ufv.br

47

#### 48 **Abstract**

49 The *SELF PRUNING* (*SP*) gene is a key regulator of growth habit in tomato  
50 (*Solanum lycopersicum*). It is an ortholog of *TERMINAL FLOWER 1*, a phosphatidyl-  
51 ethanolamine binding protein with anti-florigenic activity in *Arabidopsis thaliana*. A  
52 spontaneous loss-of-function *sp* mutation has been bred into a large number of industrial  
53 tomato cultivars, as it produces a suite of pleiotropic effects that are favorable for  
54 mechanical harvesting, including determinate growth habit, short plant stature and  
55 simultaneous fruit ripening. However, the physiological basis for these phenotypic  
56 differences has not been thoroughly explained. Here, we show that the *sp* mutation alters  
57 polar auxin transport as well as auxin responses such gravitropic curvature and elongation  
58 of excised hypocotyl segments. We further demonstrate that free auxin levels and auxin-  
59 regulated gene expression patterns are altered in *sp*, with epistatic effects of *diageotropica*,

60 a mutation in a cyclophilin A protein-encoding gene. Our results indicate that SP impacts  
61 growth habit in tomato, at least in part, via changes in auxin transport and responsiveness.  
62 These findings hint at novel targets that could be manipulated in the control of growth habit  
63 and productivity.

64 **Key words:** growth habit, *Solanum lycopersicum*, polar auxin transport, development, plant  
65 architecture

## 66 **Introduction**

67 Shoot architecture is a key agricultural trait determined mainly by side branching,  
68 internode elongation and shoot determinacy (Wang and Li, 2008). Each of these parameters  
69 configures an active research area where considerable theoretical and applied knowledge  
70 has been gained over the last decade. Shoot determinacy is a domestication trait in crop  
71 species as diverse as soybean (*Glycine max*), common bean (*Phaseolus vulgaris*) and  
72 tomato (*Solanum lycopersicum*) (Pnueli et al., 1998; Tian et al., 2010; Repinski et al.,  
73 2012). Tomato is a perennial species cultivated as annual. Wild tomatoes display  
74 indeterminate growth, resulting from a sequential addition of modules (sympodial units)  
75 formed by three leaves and an inflorescence. Sympodial growth starts in tomato when the  
76 vegetative apical meristem is converted into floral after a series of 8-12 internodes with  
77 leaves (Samach and Lotan, 2007). Vegetative growth, however, continues through the top-  
78 most axillary meristem, which grows vigorously displacing the inflorescence to the side  
79 and producing a new sympodial unit with three leaves and an inflorescence. This process is  
80 indefinitely iterated by concatenation of sympodial units one on top of the other. A  
81 spontaneous recessive mutant with compact, bushy growth habit and a reduced number of  
82 leaves in successive sympodial units was discovered in 1914 (Yeager, 1927; MacArthur,  
83 1934). It was later shown that the mutation is a single nucleotide substitution in the *SELF-*  
84 *PRUNING (SP)* gene (Pnueli et al., 1998), which shares sequence similarity with a group of  
85 mammalian polypeptides involved in cell signaling, phosphatidylethanolamine binding  
86 proteins (PEBPs) (Hengst et al., 2001; Krosiak et al., 2001). Breeding of this mutation into  
87 industrial tomato cultivars was instrumental in the advent of mechanical harvest (Rick,  
88 1978; Stevens and Rick, 1986). The loss-of-function *sp* mutant leads to determinate growth  
89 habit, as opposed to the indeterminate growth habit of wild-type tomatoes. The determinate

90 growth habit occurs via progressively reduced number of leaves per sympodium until  
91 termination in two consecutive inflorescences that top vertical growth of the plant (Samach  
92 and Lotan, 2007). Hence, this phenotype leads to simultaneous fruit ripening, therefore  
93 allowing mechanical harvest in field-grown processing tomatoes (Stevens and Rick, 1986).

94 *SP* belongs to the *CETS* gene family, which comprises *CENTRORADIALIS* (*CEN*)  
95 and *TERMINAL FLOWER 1* (*TFL1*) of *Antirrhinum* and *Arabidopsis*, respectively  
96 (Wickland and Hanzawa, 2015). *SINGLE FLOWER TRUSS* (*SFT*)/*SP3D* – a homolog of  
97 *FLOWERING LOCUS T* (*FT*) and *HEADING DATE 3A* (*HD3A*) in *Arabidopsis* and rice,  
98 respectively – is another *CETS* gene involved in the control of growth habit in tomato  
99 (Alvarez et al., 1992; Kojima et al., 2002). Unlike *sp* mutants, which do not affect  
100 flowering time, tomato *sft* loss-of-function mutants are late flowering, and also show a  
101 disruption in sympodial growth pattern: they produce a single and highly vegetative  
102 inflorescence, alternating solitary flowers and leaves (Molinero-Rosales et al., 2004). The  
103 final phenotypic outcome produced by *SP* and *SFT* depends on their local ratio, with the  
104 former maintaining meristems in an indeterminate state and the latter promoting the  
105 transition to flowering (Park et al., 2014). Heterozygous *sft* mutants in a homozygous *sp*  
106 mutant background display yield heterosis in tomato (Krieger et al., 2010). Hence, the  
107 *SP/SFT* genetic module has been proposed as a target to increase crop yield via changes in  
108 plant architecture (McGarry and Ayre, 2012; Zsögön et al., 2017). It has also been  
109 previously suggested that *SP* function could be linked to auxin (Pnueli et al., 2001), a  
110 hormone with strong effects on plant morphogenesis (Berleth and Sachs, 2001).

111 Auxin is a key controller of plant development; however, its role in the regulation of  
112 plant growth habit is still unclear. An aspect that sets auxin apart from other plant hormones  
113 is the relatively well understood nature of its transport through the plant body (Friml, 2003;  
114 Petrášek and Friml, 2009). Polar auxin transport (PAT), which occurs basipetally from the  
115 apical meristem, is critically important for the distribution of auxin within plant tissues  
116 (Rubery and Sheldrake, 1974; Sheldrake, 1974). PAT works as an organizer of apical-basal  
117 polarity in the plant body (Friml et al., 2006), thus controlling a multiplicity of  
118 developmental processes (Reinhardt et al., 2003; Blilou et al., 2005; Scarpella et al., 2006).

119 It has recently been shown that the cyclophilin A protein DIAGEOTROPICA  
120 (DGT) affects polar auxin transport (PAT) in tomato (Ivanchenko et al., 2015). DGT is a  
121 cyclophilin A protein with peptidyl-prolyl trans-cis isomerase (PPIase) enzymatic activity  
122 (Takahashi et al., 1989; Oh et al., 2006). Cyclophilins catalyse not only rate-limiting steps  
123 in the protein folding pathway but can also participate in the folding process as molecular  
124 chaperones (Kumari et al., 2013). DGT function is highly conserved across plant taxa  
125 (Lavy et al., 2012). In tomato, some of the most significant phenotypic defects caused by  
126 the lack of functional DGT protein are horizontal shoot growth, thin stems, altered  
127 secondary vascular differentiation and roots lacking lateral branches (Zobel, 1973; Muday  
128 et al., 1995; Coenen et al., 2003). Here, we investigated whether *SP* affects auxin  
129 responses, by itself, and in combination with *DGT*. We produced four combinations of  
130 functional and loss-of-function mutant alleles of *SP* and *DGT* (i.e. *SP DGT*, *SP dgt*, *sp DGT*  
131 and *sp dgt*) in a single tomato genetic background (cv. Micro-Tom) and assessed a series of  
132 physiological responses to auxin. We found that free auxin levels, polar auxin transport and  
133 gravitropic curvature of the shoot apex are all altered by *SP*. Our results further show that  
134 *SP* and *DGT* reciprocally affect *AUX/IAA* and *ARF* transcript abundances at the sympodial  
135 meristem, the key niche of *SP* function in growth habit.

136

## 137 **Results**

138 Comparison of the four combinations of homozygous wild-type and mutant lines for  
139 *SP* and *DGT* (i.e., *SP DGT*, *SP dgt*, *sp DGT* and *sp dgt*), showed that growth habit was  
140 affected solely by *SP* and not by *DGT* (Fig. 1). Regardless of their *DGT* or *dgt* allele, *SP*  
141 plants showed indeterminate growth whereas *sp* mutants were always determinate (Fig. 1).  
142 Time to flowering, however, was affected by both genes in combinatorial fashion. *dgt*  
143 plants flowered late, independently of the *SP* allele (Fig. 1). The *sp DGT* genotype showed  
144 consistently precocious flowering, and this was confirmed in an independent experiment by  
145 analysis of the rate of shoot apical meristem maturation (Fig S1). The number of leaves to  
146 the first inflorescence was also affected by the combination of alleles (Fig. 1), albeit not  
147 reflecting the time to flowering. The *dgt* mutant produced more leaves before flowering,  
148 but this effect was abolished in the double mutant *sp dgt*. Regardless of their *SP* allele, *dgt*

149 mutants exhibited markedly reduced transcript abundance of the flowering inducer *SINGLE*  
150 *FLOWER TRUSS* (*SFT*) compared to *DGT* plants (Fig. 1), which fits with the delayed  
151 flowering in these mutants in both *SP* and *sp* backgrounds (Fig. 1).

152 The tomato cultivar Micro-Tom (MT) harbors a mutation in *DWARF* (*D*), a gene  
153 coding for a key enzyme in the brassinosteroid biosynthesis pathway (Bishop et al., 1999).  
154 Since brassinosteroids are known to influence the flowering induction network  
155 (Domagalska et al., 2010; Li et al., 2010), we ascertained whether *D* could be influencing  
156 the effects of *SP* on flowering time. Using a near-isogenic MT line harboring the functional  
157 *D* allele (Carvalho et al., 2011), we constructed four allelic combinations of *SP* and *D* (*i.e.*  
158 *SP D*, *SP d*, *sp D* and *sp d*, Fig S2) and assessed their flowering time. The results show an  
159 effect of *D* on flowering time (Fig. S2) but not on the number of leaves produced to the first  
160 inflorescence, which was again reduced exclusively by the presence of the *sp* mutant allele  
161 (Fig. S2). Axillary branching was affected mainly by the *SP* gene, which led to reduced bud  
162 outgrowth in plants carrying the wild-type allele; the *dgt* mutation, however, exacerbated  
163 this repressing effect (Fig. 1). *sp* mutants, on the other hand, branched more profusely when  
164 combined with *dgt* than *DGT* (Fig. 1). Thus, *dgt* can enhance apical dominance or increase  
165 branching, depending on the presence or absence of a functional *SP* allele, respectively.  
166 The number of leaves on the primary shoot was increased by *SP*, regardless of the *DGT*  
167 allele (Table 1). Plant height was additively controlled by both genes, whereas no  
168 difference between genotypes was found in the length of the fourth internode or leaf  
169 insertion angle (Table 1). Stem diameter was increased by functional *DGT*, irrespective of  
170 the *SP* allele (Table 1). The number of inflorescences was synergistically determined by  
171 both genes, whereby pairing of functional *SP* and *DGT* led to an increased number  
172 compared to all other allele combinations (Table 1).

173 Next, the endogenous levels of free indolyl-3-acetic acid (IAA), which is the most  
174 abundant auxin in plants (Bartel and Fink, 1995), was determined in three sections of  
175 tomato seedlings: leaves plus cotyledons, hypocotyls and roots (Fig. 2). In leaves plus  
176 cotyledons, IAA concentration was more than twice higher in *sp dgt* double mutant than in  
177 the other three genotypes (Fig. 2). In the hypocotyl tissues, *SP DGT* seedlings had the  
178 lowest free IAA content, the *sp* and *dgt* single mutants presented intermediate values and

179 the double mutant (*sp dgt*) exhibited the highest IAA levels (Fig. 2). Although root IAA  
180 levels were clearly higher than in the other hypocotyl regions analyzed, no statistically  
181 significant differences in root IAA content was observed between the four genotypes (Fig.  
182 2).

183 To understand the variation in endogenous free IAA levels within the seedling  
184 tissues and among the four genotypes, we next quantified polar auxin transport (PAT) in  
185 hypocotyl segments. PAT was highest in *SP DGT*, intermediate in *sp* and *dgt* single  
186 mutants, and lowest in the double mutant (Fig. 3). This indicates that both *sp* and *dgt* alleles  
187 reduce PAT and that their effects were additive. As PAT and auxin concentration are  
188 known to influence vascular patterning (Scarpella, 2017), we also analyzed xylem anatomy  
189 in cross-sections of stems in adult plants (Fig 3). Quantification of xylem vessel density and  
190 mean vessel size revealed an antagonistic relationship between *SP* and *DGT*. Whereas *SP*  
191 tends to reduce vessel density and increase their size, *DGT* increases vessel density with  
192 concomitantly lower vessel sizes (Fig. 3). These results, however, obscure a more complex  
193 pattern, which is revealed when analyzing the vessel size distributions. The functional *DGT*  
194 allele increased the incidence of larger (>800  $\mu\text{m}^2$  cross-sectional area) vessels, particularly  
195 in *sp* mutant plants (Fig 3). Another physiological response affected by PAT is negative  
196 gravitropism of the shoot (Morita, 2010). The kinetics of gravitropic curvature in seedling  
197 shoots was affected by both *SP* and *DGT* (Fig. 4). Loss of *SP* function decreased  
198 gravitropic response in both *DGT* and *dgt* backgrounds. Hypocotyl elongation in response  
199 to exogenous auxin and *in vitro* rhizogenesis from cotyledon explants are assays to  
200 determine auxin sensitivity (Cary et al., 2001). The *dgt* mutation considerably reduces  
201 hypocotyl responsivity to auxin in all concentrations, as described previously (Kelly and  
202 Bradford, 1986; Rice and Lomax, 2000). The functional *SP* allele increased hypocotyl  
203 elongation in a *DGT* background and also exerts a significant compensatory effect on the  
204 elongation response in the *dgt* mutant (Fig. 4). In the *in vitro* root regeneration assay, as  
205 expected, root formation was reduced in *dgt* mutants (Coenen and Lomax, 1998), but also  
206 in *sp* compared to *SP* in the presence of a functional *DGT* allele (Fig. S3).

207 Histochemical analysis of *DR5* promoter activity revealed no discernible staining  
208 difference in both *SP* and *sp* seedlings incubated in water, although roots of the *sp* mutant

209 showed a shorter trace of GUS precipitate in the vascular cylinder (Fig. 5). Exogenous  
210 IAA, however, strongly induced GUS expression in *SP* compared to *sp* plants, which was  
211 evident both in seedlings and in root tips and confirmed by fluorimetric GUS quantitation  
212 (Fig. 5). Fainter GUS staining was observed for both auxin treated and untreated roots in  
213 the *dgt* mutant (Fig S4). As PIN-FORMED (PIN) auxin efflux transporters are key players  
214 determining auxin distribution in plants, we quantified the relative expression of the *PIN1*,  
215 *PIN2* and *PIN3* genes in roots with or without prior auxin incubation. Auxin treatment  
216 induced *PIN1* and *PIN3* expression in all genotypes, except in the *sp dgt* double mutant  
217 (Fig. 5). *PIN2* expression was reduced by auxin incubation in *SP DGT*, *SP dgt* and *sp dgt*,  
218 but not in *sp DGT* (*i.e.* cv Micro-Tom), where a low basal level of expression was observed  
219 for all three genes.

220 Finally, we determined whether auxin affects *SP* at the transcriptional level, as  
221 suggested by the presence of auxin-response elements (TGTCTC, and their degenerate  
222 version, TGTCNC) (Ulmasov et al., 1995) in the 3' and 5' flanking regions of the *SP* gene  
223 in tomato and related Solanaceae species (Fig. 6). Analyzing *SP* mRNA levels in seedlings  
224 of *SP DGT* and *sp DGT* plants sprayed with IAA or a mock solution, revealed that *SP*  
225 expression was induced by IAA treatment in both genotypes. Importantly, *SP* transcript  
226 levels were significantly higher in *dgt* mutant plants both in IAA-treated and control  
227 seedlings (Fig. 6). We further assessed the effect of *SP* and *DGT* on the mRNA levels of  
228 the key players in the auxin signaling cascades, including some members of the *AUXIN*  
229 *RESPONSE FACTORS* (*ARF*) and *AUXIN/INDOLE-3-ACETIC ACID INDUCIBLE*  
230 (*Aux/IAA*) gene families, which were chosen by their high auxin-inducibility (Audran-  
231 Delalande et al., 2012). *SP* and *DGT* had combinatorial effects in the expression levels of  
232 *IAA1*, *IAA2*, *IAA9*, *ARF8*, and *ARF10*, whereas functional *DGT* decreased expression of  
233 *IAA3* (Fig. 6).

234

## 235 **Discussion**

236 *Impact of SP alleles, and their interaction with auxin, in the control of shoot architecture*



237           Although it has been previously demonstrated that the *sp* mutation does not alter  
238 tomato flowering time or the number of leaves before termination of the shoot (Pnueli et  
239 al., 1998; Shalit et al., 2009), *SP* orthologs vary in this respect depending on the species.  
240 Flowering time is not affected in *cen* mutants in *Antirrhinum* (Bradley et al., 1996),  
241 whereas *Arabidopsis* *tfl1* mutants flower earlier and *TFL1* overexpression delays flowering  
242 by preventing the meristem transition from vegetative to floral (Ratcliffe et al., 1998). In  
243 soybean, where large intraspecific variation exists in time to flowering, association  
244 mapping has recently linked this important agronomic trait to the *Dt1* locus, a  
245 *CEN/TFL1/SP* ortholog (Zhang et al., 2015). Comparison of determinate and indeterminate  
246 near-isogenic soybean lines consistently showed earlier flowering in the former across  
247 different locations and planting seasons (Ouattara and Weaver, 1994). Our data show that  
248 loss of *SP* function (*sp* allele) leads to slightly but consistently earlier flowering in tomato,  
249 measured either in days after germination or the reduction of the number of nodes before  
250 the first inflorescence. Using a near isogenic line harbouring the wild type *Dwarf* (*D*) allele,  
251 which codes for a brassinosteroid (BR) biosynthesis gene (Marti et al., 2006), we showed  
252 here that this effect is not related to reduced BR levels in MT. This is in agreement with the  
253 fact that the phenotypes of the *sp* and *dgt* individual mutants in the MT background closely  
254 resemble those published for the same mutations in other tomato cultivars (Carvalho et al.,  
255 2011). It is therefore unlikely that the combination of both mutations (*sp* and *dgt*) would be  
256 affected epistatically by the *d* allele (Campos et al., 2010). Interestingly, the *dgt* mutation  
257 delays the number of days to flowering in either *SP* or *sp* backgrounds (Balbi and Lomax,  
258 2003), apparently by reducing the expression of *SINGLE FLOWER TRUSS* (*SFT*) gene,  
259 which encodes the florigen (Evans, 1971; Shalit et al., 2009). It does not, however,  
260 significantly affect the number of leaves produced before termination, which is a proven  
261 effect of *SFT* and its orthologs in tomato and other species (Kojima et al., 2002; Lifschitz  
262 and Eshed, 2006; Navarro et al., 2015). Hence, the loss-of-function *sft* mutant produced  
263 130% more leaves on the primary shoot than the control MT (Vicente e al., 2015).  
264 Conversely, transgenic tomato plants overexpressing *SFT* flower after only three or four  
265 leaves (Molinero-Rosales et al, 2004; Shalit et al, 2009).

266           Axillary branching was increased in *sp* mutants in both *DGT* and *dgt* allele  
267 backgrounds. The expression of *SP* is higher in axillary meristems, suggesting a possible

268 role for *SP* in the control of apical dominance (Thouet et al., 2008). Our results reinforce  
269 this notion, as *sp* mutants are more profusely branched than wild-type plants. This also  
270 agrees with the effects of the *SP* ortholog *Dt1* in soybean, where comparison of determinate  
271 and indeterminate isogenic lines revealed an increased propensity to side branching in the  
272 former (Gai et al., 1984). The *dgt* mutant responds to auxin treatment of decapitated shoots,  
273 which inhibits bud outgrowth to the same extent as in wild-type plants (Cline, 1994).  
274 Apical dominance has been reported to be reduced in intact *dgt* plants (Coenen et al., 2003),  
275 but caution should be exercised when interpreting these results, as published work on *dgt*  
276 has been conducted in tomato cultivars differing in their *SP* alleles (Supplementary Table  
277 1). Our results indicate a strong and complex interaction between *SP* and *DGT* in the  
278 control of apical dominance: the *dgt* mutation increased it in the wild-type *SP* background,  
279 but also increased axillary bud outgrowth in the *sp* background, enhancing its branching  
280 phenotype.

#### 281 *Control of endogenous auxin levels and polar auxin transport by SP and DGT*

282 Endogenous IAA concentration and distribution within tissues determine a wide  
283 range of plant developmental processes, including apical dominance, stem growth, vascular  
284 patterning, root development and others (Petrášek and Friml, 2009; Ljung, 2013). IAA  
285 synthesis is maximal in younger, developing parts of the plant such as leaflets and root  
286 apices (Ljung et al., 2002). IAA levels in dark-grown seedlings (Fujino et al. 1988) and  
287 roots (Muday et al., 1995) of *sp dgt* and *SP DGT* plants are indistinguishable. However,  
288 free IAA levels in aerial parts of seven-day-old light-grown seedlings of *sp dgt* plants were  
289 twice as high as in *SP DGT* plants (Fig. 2), suggesting a light-dependent, synergistic  
290 influence of the *sp* and *dgt* alleles on auxin synthesis, degradation, or transport.

291 The above results could reflect changes in IAA biosynthesis, degradation or  
292 transport. The reduction in PAT produced by the *dgt* mutation was described previously  
293 (Ivanchenko et al., 2015), but the synergistic effect of the *sp* mutation described here was  
294 unexpected. The differences in IAA concentration in the aerial part of the seedlings could  
295 be due to altered PAT caused by both the *sp* and *dgt* mutations. PAT from the shoot organs  
296 to the root tips induces the formation of the entire plant vascular system (Aloni, 2013;  
297 Marcos and Berleth, 2014), as evidenced by the repression of protoxylem formation upon

298 treatment with the auxin transport inhibitor NPA (Bishopp et al, 2012) and the polar  
299 localization of PIN1 in pre-procambial cells (Scarpella et al, 2006). Lack of large secondary  
300 xylem vessels was conspicuous in the *dgt* mutant, as previously described (Zobel, 1974). In  
301 plants harbouring the functional *DGT* allele, the effect of the *sp* mutation was to increase  
302 the incidence of larger (>800  $\mu\text{m}^2$  cross-sectional area) vessels. In tree species, there is  
303 evidence that the relationship between xylem vessel density and size involves differential  
304 regulation of the duration of tracheid expansion along the longitudinal (Anfodillo et al,  
305 2012; Sorce et al, 2013) and radial (Tuominen et al, 1997) axes. Tree stature has a strong  
306 influence on vessel width due to an allometric scaling effect (Morris et al, 2017). It remains  
307 to be seen if this is also the case in herbs, and if the effect of the *SP* gene on xylem width is  
308 indirectly caused by its control of plant height, or directly by its influence on PAT.  
309 Increased PAT in the *polycotyledon* tomato mutant, for instance, leads to an altered  
310 vascular pattern in the hypocotyl (Al-Hammadi et al, 2003; Kharshiing et al, 2010).

311 *SP affects excised hypocotyl elongation, gravitropic responses, and root regeneration and*  
312 *elongation*

313 Elongation of excised hypocotyl segments in response to different concentrations of  
314 exogenous auxin is a classical assay for auxin sensitivity (Gendreau et al., 1997; Collett et  
315 al., 2000). The hypocotyl elongation response of *dgt* has been described in the background  
316 of tomato cultivar VFN8, a mutant for *sp* (Supplemental Table 1). In both intact or excised  
317 hypocotyl segments, a reduced response to exogenous auxin was observed for the *sp dgt*  
318 double mutant (Kelly and Bradford, 1986; Rice and Lomax, 2000). We confirmed these  
319 results, but show that a functional *SP* allele leads to increased elongation in either *DGT* or  
320 *dgt* backgrounds. Collectively, these results indicate that some compensatory effect can be  
321 ascribed to *SP* on this response. Hypocotyl elongation in *Arabidopsis* relies on auxin-  
322 induced changes in the activity of plasma membrane  $\text{H}^+$ -ATPases, which leads to increased  
323  $\text{H}^+$  extrusion and cell expansion, through expansin-mediated cell wall loosening, as per the  
324 acid growth theory (Takahashi et al., 2012). Hypocotyl elongation upon exogenous auxin  
325 application, points to a positive effect of *SP* on the activity of plasma membrane  $\text{H}^+$ -  
326 ATPases. Interestingly, the activity of both plasma membrane  $\text{H}^+$ -ATPases and PIN efflux  
327 transporters, which are also influenced by *SP* at the transcriptional level (Fig. 4), is

328 regulated by changes in their phosphorylation state (Takahashi et al., 2012; Zourelidou et  
329 al., 2014; Weller et al., 2017). This fits with earlier suggestions that *SP*, which encodes a  
330 phosphatidylethanolamine binding protein (PEBP), exerts at least some of its effects on  
331 membrane proteins through interaction with kinases (Pnueli et al., 2001).

332 The Cholodny-Went hypothesis is a classical model suggesting that differential  
333 auxin distribution is the cause of directional plant bending with respect to an exogenous  
334 stimulus such as light or gravity (Went, 1974). That *DGT* is required for a correct  
335 gravitropic response of roots and shoots has been demonstrated, but the explanation at the  
336 molecular level is still lacking (Muday et al., 1995; Rice and Lomax, 2000). To the best of  
337 our knowledge, an effect of *SP* on shoot gravitropism had not been tested before.  
338 Functional *SP* enhances shoot gravitropism in horizontally positioned plants of either *DGT*  
339 or *dgt* background. Functional *SP* produces taller plants, so it is tempting to speculate that  
340 they should have a stronger gravitropic response in order to facilitate the bending of a  
341 larger stem. In *Arabidopsis*, the IAA efflux transporter PIN3 mediates lateral redistribution  
342 of auxin and is therefore involved in hypocotyl and root tropisms (Friml et al., 2002). It  
343 seems reasonable to suggest a link between *SP* and PIN3 in the face of our *PIN* gene  
344 expression profiles (Fig. 5). Remarkably, both types of efflux transporters, PIN1 and PIN3,  
345 have been shown to relocate at the subcellular level via the same mechanism: vesicle  
346 trafficking along the actin cytoskeleton between the plasma membrane and endosomes  
347 (Geldner et al., 2001; Friml et al., 2002). Dissecting the intertwined mechanisms involved  
348 in this possible co-regulation will be required to fully understand to which extent and how  
349 exactly *SP* affects auxin distribution.

350 High concentrations of exogenous auxin inhibit root elongation. As expected, the  
351 *dgt* mutation reduced auxin-induced inhibition (Coenen and Lomax, 1998) in root  
352 elongation, however, a functional *SP* allele led to lower inhibition than in the double *sp dgt*  
353 mutant. This result could be ascribed to a new balance in auxin transport and signaling  
354 produced by the combination of *SP* and *DGT*. Root growth increases with the strength of  
355 auxin signaling up to a certain optimum, and then begins to decline, probably following a  
356 parabolic trajectory (Sibout et al, 2006). *In vitro* root regeneration, on the other hand, is  
357 stimulated by low concentrations of auxin and *dgt* is relatively insensitive to this exogenous

358 treatment (Coenen and Lomax, 1998). Interestingly, the *sp* mutation also reduces  
359 rhizogenesis (Fig S3), which reinforces the notion of *SP* positively influencing PAT, as the  
360 PAT inhibitor TIBA has been shown to reduce *in vitro* root formation in tomato (Tyburski  
361 and Tretyn, 2004).

### 362 *Interactions between SP and the auxin signaling machinery*

363 Auxin signaling output can be estimated by following *DR5* promoter activation  
364 pattern (Ulmasov et al., 1995; Liao et al., 2015). For example, GUS staining of *DR5::GUS*  
365 has revealed that auxin flux at the root tips proceeds acropetally up to the root cap, where it  
366 is redistributed via lateral efflux transporters toward a peripheral basipetal transport route  
367 (Benková et al., 2003; Paciorek et al., 2005; Dhonukshe et al., 2008). Exogenous auxin  
368 application leads to greater GUS signal in seedlings with a functional *SP* allele, owing  
369 probably to alterations in the auxin signaling machinery produced by *SP*, such as  
370 expression of *Aux/IAA* and *ARF* family genes (Fig. 6).

371 Auxin signalling is strongly dependent on auxin levels and the responsiveness of  
372 target cells. At low IAA levels, a suite of repressor proteins, including *Aux/IAA* and  
373 *TOPLESS*, repress ARFs, a group of transcription factors which regulate the expression of  
374 auxin-responsive genes (Causier et al., 2012; Bargmann and Estelle, 2014; Chandler, 2016).  
375 At high IAA levels, auxin acts as a molecular glue to stabilize the TIR1/AFB receptor  
376 binding and tagging of *Aux/IAAs* for 26S proteasome degradation (Hayashi, 2012). This, in  
377 turn, frees ARFs bound to Auxin-Response Elements (*AuxRE*) in the genome (TGTCTC,  
378 or its degenerate, but also functional form, TGTCNC) to activate or repress gene expression  
379 (Ulmasov et al., 1995). Our *in silico* analyses demonstrated the presence of conserved  
380 *AuxRE* elements both 5' (upstream) and 3' (downstream) of the *SP* coding sequence in the  
381 genome of tomato and closely related species. It has recently been shown that the 3' region  
382 of *TFL1* in *Arabidopsis* contains multiple auxin *cis*-regulatory elements key for the control  
383 of spatio-temporal expression of the gene (Serrano-Mislata et al., 2016). It remains to be  
384 determined whether such *cis*-regulatory elements are also functional in tomato and if they  
385 are involved in the response of *SP* expression to auxin.

386 Tomato has 25 *Aux/IAA* and 22 *ARF* genes (Audran-Delalande et al., 2012; Zouine  
387 et al., 2014), indicating that auxin signalling is very complex. DGT can alter the expression

388 of genes related to auxin signaling (Mito and Bennett, 1995), including *Aux/IAA* genes  
389 (Nebenführ et al., 2000). It was recently discovered that cyclophilin peptidyl-prolyl  
390 isomerases (PPIases) catalyse the *cis/trans* isomerisation of peptide bonds preceding  
391 proline residues of target peptides, including *Aux/IAAs* (Jing et al., 2015). Only *Aux/IAA*  
392 peptides of the right conformation can bind to the TIR1 receptor and be tagged for  
393 degradation, thus PPIases, such as DGT, are believed to play a key role in auxin perception  
394 (Su et al., 2015). It is likely that some transcriptional feedback exists when the right  
395 conformers are not produced, as suggested by increased transcript levels of *IAA3* and  
396 reduced levels of *IAA9* in *dgt* mutants. Furthermore, our *in silico* analysis shows that the *sp*  
397 mutation occurs in a highly conserved *cis*-proline residue in a DPDxPxn10H consensus  
398 region in the PEBP domain (Fig. S3), which is a potential target for PPIases. Whether this  
399 putative molecular interaction between SP and DGT could account for the phenotypic  
400 outcomes shown here, remains to be determined.

401

## 402 **Conclusions**

403 Auxin gradients are critical for organogenesis in the shoot apex, however, the  
404 influence of this hormone on shoot determinacy, which is a key determinant of growth  
405 habit, has never been addressed in depth. Our data provides the first link between auxin and  
406 the anti-florigenic protein SELF-PRUNING (SP), the main switch between indeterminate  
407 and determinate growth habit in tomato. Although it is not clear whether auxin itself can  
408 affect growth habit, a physiological interaction between this hormone and members of the  
409 CETS family was clearly demonstrated here. Hence, *SP* alleles affected various auxin-  
410 related responses (*e.g.* apical dominance, PIN1-mediated polar auxin transport, vascular  
411 differentiation, H<sup>+</sup> extrusion and gravitropism responses), different *SP* orthologs presented  
412 AuxREs, and the auxin mutant *dgt* downregulated *SFT* and upregulated *SP* expression.  
413 There are now increasing evidences that *SP/SFT* genetic module is a hub in crop  
414 productivity, affecting heterosis for yield (Krieger *et al.*, 2010) and improving plant  
415 architecture and the vegetative-to-reproductive balance (McGarry and Ayre, 2012; Vicente  
416 et al., 2015; Zsögön *et al.*, 2017). Our results suggest that at least part of the effect of the

417 SP/SFT module on yield is mediated by auxin. This knowledge may inspire novel and more  
418 precise manipulation of this hormone for applications in agriculture.

419

## 420 **Materials and methods**

### 421 **Plant material**

422 Seeds of the tomato (*Solanum lycopersicum*, L.) cultivar Micro-Tom (MT) were  
423 kindly donated by Dr. Avram Levy (Weizmann Institute of Science, Israel) in 1998 and  
424 subsequently maintained (through self-pollination) as a true-to-type cultivar. MT seeds  
425 carrying the synthetic auxin-responsive (*DR5*) promoter fused to the reporter gene *uid*  
426 (encoding a  $\beta$ -glucuronidase, GUS) were obtained from Dr. José Luiz García-Martínez  
427 (Universidad Politécnica de Valencia, Spain). The *diageotropica* (*dgt*) mutation was  
428 introgressed into MT from its original background in cv. VFN8 (LA1529), donated by Dr.  
429 Roger Chetelat (Tomato Genetics Resource Center, Davis, University of California, USA).  
430 The functional allele of *SELF-PRUNING* was introgressed from cv. Moneymaker  
431 (LA2706).

432 Introgression of mutations into the MT cultivar was described previously (Carvalho  
433 et al., 2011). A comparison between indeterminate (*SP/SP*) and determinate (*sp/sp*) plants  
434 in the MT background has been published previously (Vicente et al., 2015). Both *sp* and  
435 *dgt* mutations were confirmed by CAPS marker analyses and sequencing, respectively. All  
436 experiments were conducted on BC<sub>6</sub>F<sub>3</sub> plants or subsequent generations (Sestari et al.,  
437 2014). *In vitro* seedling cultivation was conducted under controlled conditions (16h/8 h  
438 day/night, approximately 45  $\mu\text{mol m}^{-2} \text{s}^{-1}$  PAR, 25 $\pm$ 1°C) in flasks with 30 ml of MS/2  
439 media gellified with 0.5% agar, pH 5.8. Seeds were surface sterilized by agitation in 30%  
440 (v/v) commercial bleach (2.7% sodium hypochlorite) for 15 min followed by three rinses  
441 with sterile distilled water.

442

### 443 **Growth conditions**

444 Plants were grown in greenhouse in Viçosa (642 m asl, 20°45' S; 42°51' W), Minas  
445 Gerais, Brazil, under semi-controlled conditions: mean temperature of 28°C, 11.5 h/13 h  
446 (winter/summer) photoperiod, and 250-350  $\mu\text{mol m}^{-2} \text{s}^{-1}$  PAR irradiance and irrigation to  
447 field capacity twice a day. Seeds were germinated in 350-mL pots with a 1:1 (v/v) mixture  
448 of commercial potting mix Basaplant® (Base Agro, Brazil) and expanded vermiculite  
449 supplemented with 1g L<sup>-1</sup> 10:10:10 NPK and 4 g L<sup>-1</sup> dolomite limestone (MgCO<sub>3</sub> +  
450 CaCO<sub>3</sub>). Upon appearance of the first true leaf, seedlings of each genotype were  
451 transplanted to pots containing the soil mix described above, except for the NPK  
452 supplementation, which was increased to 8 g L<sup>-1</sup>.

453

#### 454 **Auxin quantification**

455 Endogenous indole acetic acid (IAA) levels were determined by gas  
456 chromatography tandem mass spectrometry-selecting ion monitoring (GC-MS-SIM,  
457 Shimadzu model GCMS-QP2010 SE). Samples (50-100 mg fresh weight, FW) were  
458 extracted and methylated as described in (Rigui et al., 2015). About 0.25  $\mu\text{g}$  of the labeled  
459 standard [<sup>13</sup>C<sub>6</sub>]IAA (Cambridge Isotopes, Inc.) was added to each sample as internal  
460 standards. The chromatograph was equipped with a fused-silica capillary column (30m, ID  
461 0.25 mm, 0.50  $\mu\text{m}$  thick internal film) DB-5 MS stationary phase using helium as the  
462 carrier gas at a flow rate of 4.5 mL min<sup>-1</sup> in the following program: 2 min at 100°C,  
463 followed a ramp by 10°C min<sup>-1</sup> to 140°C, 25°C min<sup>-1</sup> to 160°C, 35°C min<sup>-1</sup> to 250°C, 20°C  
464 min<sup>-1</sup> to 270°C and 30°C min<sup>-1</sup> to 300°C. The injector temperature was 250°C and the  
465 following MS operating parameters were used: ionization voltage, 70 eV (electron impact  
466 ionization); ion source temperature, 230°C; interface temperature, 260°C. Ions with a mass  
467 ratio/charge (m/z) of 130 and 189 (corresponding to endogenous IAA) and 136 and 195  
468 (corresponding to [<sup>13</sup>C<sub>6</sub>]-IAA) were monitored and endogenous IAA concentrations were  
469 calculated based on extracted chromatograms at m/z 130 and 136.

470

#### 471 **Polar auxin transport analysis**



472 Polar auxin transport (PAT) was assayed in hypocotyl segments of 2-week-old  
473 seedlings according to the protocol originally described by (Al-Hammadi et al., 2003) with  
474 some modifications. Briefly, 10 mm hypocotyl sections were excised and incubated in 5  
475 mM phosphate buffer (pH 5.8) containing 1  $\mu$ M IAA for 2 h at  $25 \pm 2^\circ\text{C}$  on a rotary shaker  
476 (200 rpm). These segments were placed between receiver (1% [w/v] agar in water) and  
477 donor blocks (1% [w/v] agar in 5 mM phosphate buffer [pH 5.8] containing 1  $\mu$ M IAA and  
478 100 nM  $^3\text{H}$ -IAA) oriented with their apical ends toward the donor blocks. After 4 h of  
479 incubation inside a humid chamber at  $25 \pm 2^\circ\text{C}$ , the receiver blocks were removed and  
480 stored in 3 mL scintillation cocktail (Ultima Gold™, PerkinElmer, USA). Receiver blocks  
481 plus scintillation cocktail were shaken overnight at 100 rpm and  $28 \pm 2^\circ\text{C}$  before analysis in  
482 a scintillation counter. As negative control, some hypocotyl segments were sandwiched for  
483 30 min between 1-*N*-naphthylphthalamic acid (NPA)-containing blocks (1% [w/v] agar in  
484 water containing 20  $\mu$ M NPA) prior the auxin transport assays.  $^3\text{H}$  d.p.m. was converted to  
485 fmol auxin transported as described in (Lewis and Muday, 2009).

486

#### 487 **Auxin sensitivity assays**

488 Root regeneration from cotyledon explants was conducted as described (Cary et al,  
489 2001). Briefly, cotyledon explants were obtained from eight-day old seedlings germinated  
490 *in vitro* in half-strength MS medium. The explants were then incubated on Petri dishes  
491 containing MS with or without supplementation with 0.4  $\mu$ M NAA. After 8 days, the  
492 number of explants with visible roots (determined using a magnifying glass) was counted.

493 For hypocotyl elongation assays, hypocotyls were excised from two week-old  
494 seedlings and cut into 5-mm sections. Between 15 and 20 segments were pre-incubated for  
495 each treatment, floated on buffer (10 mM KCl, 1 mM MES-KOH [pH 6.0], and 1% [w/v]  
496 Suc for 2 h at  $25^\circ\text{C}$  in the dark to deplete endogenous auxin. Segments were then incubated  
497 on buffer (10 mM KCl, 1 mM MES-KOH [pH 6.0], and 1% [w/v] Suc and NAA at the  
498 indicated concentration for 24 h on a shaker at  $25^\circ\text{C}$  under white light. Segments were  
499 photographed to determine their length using ImageJ (NIH, Bethesda, MA, USA). The  
500 experiment was repeated three times with similar results.

501 For the gravitropism assays, plants were germinated in 350 ml pots and transferred  
502 to 50 mL Falcon tubes two days after germination (dag). The gravitropic response was  
503 assessed 10 dag by placing five plants of each genotype horizontally and photographing  
504 them in 30 minute intervals. The angle of shoot bending at each time point was determined  
505 using AutoCad 2016 (Autodesk, Inc., San Rafael, CA, Estados Unidos da América).  
506 Sterilized seeds were germinated in petri dishes onto two layers of filter paper moistened  
507 with distilled water, and incubated for 4 d at 25°C in the dark. Ten germinated seeds with  
508 radicles of 5-10 mm were transferred to vertically oriented square Petri dishes (120 mm ×  
509 120 mm) aligned on each plate with the radicles pointing down. The plates contained MS  
510 medium supplemented with vitamins, pH 5.7, 3% (w/v) sucrose, 0.8% (w/v) agar and 10  
511 μM α-naphthaleneacetic (NAA) for the auxin treatment. Plates were incubated in a growth  
512 chamber in the dark.

513 *In vitro* root elongation in response to exogenous auxin was assessed as follows.  
514 Seeds were surface-sterilized and imbibed for two days at 4°C in the dark on agar plates  
515 containing half-strength MS growth medium (Murashige and Skoog, 1962), transferred to  
516 growth chamber under control conditions (12h photoperiod, 150 μmol m<sup>-2</sup> s<sup>-1</sup> white light,  
517 22°C/20°C throughout the day/night cycle, 60% relative humidity). After four days, ten  
518 seedlings per plate were transferred to half-strength MS medium with or without 10μM  
519 NAA (α - naphthalene acetic acid - Sigma-Aldrich, St. Louis, MO, USA) and covered  
520 completely with aluminum foil for eight days. Root elongation was assessed every second  
521 day under dim light conditions.

522

### 523 **Histochemical assays**

524 Transgenic *DR5::GUS* plants were incubated overnight at 37°C in GUS staining  
525 solution (100 mM NaH<sub>2</sub>PO<sub>4</sub>; 10 mM EDTA, 0,5 mM K<sub>4</sub>Fe(CN)<sub>6</sub>; 0,05% Triton X-100,  
526 1mM 5-bromo-4-chloro-3-indolyl-beta-D-glucuronic acid). Following GUS staining,  
527 samples were washed in a graded ethanol series to remove chlorophyll. Samples were then  
528 photographed using a Leica S8AP0 (Wetzlar, Germany) magnifying glass set to 80×  
529 magnification, coupled to a Leica DFC295 camera (Wetzlar, Germany). Quantitative GUS

530 activity was assayed according to Jefferson et al. 1987, with some modifications. Briefly,  
531 samples were ground in liquid nitrogen and subsequently homogenized in MUG extraction  
532 buffer composed of 50 mM Hepes-KOH (pH 7.0), 5 mM DTT and 0.5% (w/v)  
533 PVP. After centrifugation, 200  $\mu$ L aliquots of the supernatant was mixed with 200  $\mu$ L GUS  
534 assay buffer composed of 50 mM HEPES-KOH (pH 7.0), 5 mM DTT, 10 mM EDTA and 2  
535 mM 4-methylumbelliferyl- $\beta$ -D-glucuronide (MUG) and incubated at 37 °C for 30 minutes.  
536 Subsequently, aliquots of 100  $\mu$ L were taken from each tube and the reactions were stopped  
537 and fluorescence was analyzed using a spectrofluorometer (LS55, Perkin Elmer) with  
538 365 nm excitation and 460 nm emission wavelength (5 nm bandwidth).

539

#### 540 **Gene expression analyses**

541 Total RNA was extracted from approximately 30 mg FW of sympodial meristems  
542 of 10-day old plants following the protocol of the manufacturer (Promega SV total RNA  
543 isolation system). For auxin treatments plants were previously sprayed with 10  $\mu$ M IAA or  
544 mock-sprayed 24 h prior to RNA extraction. Four biological replicates were used for  
545 subsequent cDNA synthesis. Each replicate consisted of a pool of three plants each were  
546 used for the analyses, since sympodial meristems are small and did not provide enough  
547 biological material for RNA extraction. Two technical replicates were then performed on  
548 each of the four samples. RNA integrity was analyzed on 1% agarose gel and RNA  
549 concentration was estimated before and after treatment with DNase I (Amplification Grade  
550 DNase I, Invitrogen). Total RNA was transcribed into cDNA using the enzyme reverse  
551 transcriptases, Universal RiboClone<sup>®</sup> cDNA Synthesis (Promega, Madison, WI, USA)  
552 following the manufacturers' protocols.

553 For gene expression analyses Power SYBR<sup>®</sup> green PCR Master Mix was used in  
554 MicroAmp<sup>™</sup> Optical 96-well reaction plates (both from Applied Biosystems, Singapore)  
555 and adhesive film MicroAmp<sup>™</sup> Optical (Applied Biosystems, Foster City, CA, USA). The  
556 number of reactions from the cycle threshold (CT) as well as the efficiency of reaction were  
557 estimated using the Real-Time PCR Miner tool (Zhao and Fernald, 2005).

558 Relative expression was normalized using actin and ubiquitin; actin was used to  
559 calculate  $\Delta\Delta$ CT assuming 100% efficiency of amplification of genes ( $2^{-\Delta\Delta$ CT). Primer

560 sequences used are shown in Supplementary Table 1. Melting curves were checked for  
561 unspecific amplifications and primer dimerization.

562

### 563 ***In silico* sequence analyses**

564 *SP* gene alignments was performed using the ClustalW alignment option of the Geneious  
565 R9 (Biomatters, Auckland, New Zealand) software package.

566

### 567 **Statistical analysis**

568 ANOVA and Tukey HSD tests were performed using Assistat 7.6 beta (<http://assistat.com>).

569 Percentage data were converted to inverse function (1/X) before analysis.

570

### 571 **Acknowledgments**

572 This work was supported by funding from the Agency for the Support and Evaluation of  
573 Graduate Education (CAPES-Brazil), the National Council for Scientific and Technological  
574 Development (CNPq-Brazil), Foundation for Research Assistance of the São Paulo State  
575 (FAPESP-Brazil) and the Foundation for Research Assistance of the Minas Gerais State  
576 (FAPEMIG-Brazil). We thank CAPES for studentships granted to J.M.R., W.B.S., and  
577 D.S.R. FAPESP provided grants for M.H.V. (2016/05566-0), L. F. (2013/18056-2),  
578 L.E.P.P. (2015/50220-2), and A.Z. (2013/11541-2). W.L.A. and L.E.P.P. also acknowledge  
579 grants from CNPq (grant 307040/2014-3 to L.E.P.P.). We thank Biomatters Ltd.  
580 (Auckland, New Zealand) for the kind gift of a Geneious R9 licence.

### 581 **Table**

**Table 1.** Parameters that define growth habit: (i) number of leaves on the primary shoot (PS) (i.e. number of leaves up to the first inflorescence); (ii) number of leaves on the main shoot (MS) (i.e. number of leaves of PS plus leaves on sympodial units (SU) following the first inflorescence); (iii) height of PS, MS and lateral shoot (LS); (iv) internode length (cm); (v) leaf angle insertion; (vi) diameter of stem and (vii) number of flowers, fruits and flowers per inflorescence. Measurements performed 60 days after germination. Data are mean  $\pm$  s.e.m. (n = 10 plants).

|                         | <i>SP, DGT</i>    | <i>SP, dgt</i>    | <i>sp, DGT</i>    | <i>sp, dgt</i>    |
|-------------------------|-------------------|-------------------|-------------------|-------------------|
| Number of leaves on the | 9.00 $\pm$ 0.36 a | 9.09 $\pm$ 0.28 a | 7.50 $\pm$ 0.48 b | 7.67 $\pm$ 0.58 b |

| primary shoot              |              |              |              |              |
|----------------------------|--------------|--------------|--------------|--------------|
| Height of the main shoot   | 17.45±0.79 a | 12.74±0.61 b | 13.45±0.49 b | 10.70±1.07 b |
| Length of fourth internode | 1.08±0.12 a  | 1.11±0.07 a  | 1.28±0.13 a  | 1.22±0.22 a  |
| Leaf insertion angle       | 74.81±3.41a  | 74.87±3.26 a | 73.01±4.38 a | 63.54±5.22 a |
| Stem diameter              | 5.46±0.26 a  | 4.36±0.12 ab | 5.36±0.21 a  | 4.45±0.1 b   |
| Flowers per inflorescence  | 7.00±0.71 b  | 7.80±0.45 a  | 7.00±0.00 b  | 7.00±0.5 b   |
| Number of inflorescences   | 12.4±1.14 a  | 9.20±1.30 b  | 7.40±0.89 b  | 8.80±1.48 b  |

582 Different letters indicate statistically significant differences (Tukey's test,  $p < 0.05$ ) among genotypes.

583

## 584 Figure legends

585 **Figure 1. Additive phenotype of the *self-pruning* (*sp*) and *diageotropica* (*dgt*) mutations in tomato cv.**  
 586 **Micro-Tom (MT).** (A) Representative plants of *SP DGT*; *SP dgt*; *sp DGT* (cv. MT) and *sp dgt*, 90 dag. Note  
 587 the simultaneous fruit ripening in *sp* compared to *SP*, a well-known effect of the *sp* mutation. The *dgt*  
 588 mutation delays fruit ripening (at least in part due to its late flowering, as indicated in b) in either genetic  
 589 background. Bar=10 cm. (B) **Chronological time to flowering in *sp* and *dgt* mutants.** Percentage of plants  
 590 ( $n=15$ ) with at least one open flower. MT (*sp DGT*) plants flower earlier than wild type (*SP DGT*), whereas  
 591 *dgt* mutants are late flowering. (C) **Developmental time to flowering in *sp* and *dgt* mutants.** The number of  
 592 leaves produced before the first inflorescence was reduced in *sp DGT* (MT) and increased in genotypes  
 593 carrying the functional allele of *SP*. Letters indicate statistically significant differences (Dunn's multiple  
 594 comparisons test  $p < 0.05$ ). (D) ***sp* and *dgt* alter expression of the flowering inducer *SINGLE FLOWER***  
 595 ***TRUSS* (*SFT*).** The *dgt* mutation leads to lower *SFT* expression and thus delays flowering. A minor influence  
 596 from *SP* reducing *SFT* levels is also noticeable. Asterisks indicate statistically significant differences with the  
 597 wild-type *SP DGT* (Student's t-test,  $p < 0.05$ ). (E) **Effect of *sp* and *dgt* on side branching.** Schematic  
 598 representation of side branching in shoots of *SP DGT*; *SP dgt*; *sp DGT* (MT) and *sp dgt* ( $n=15$ ). Pie charts  
 599 depicting the distribution of side branches in each genotype 60 dag. Grey denotes absence of axillary bud;  
 600 yellow, a visible bud ( $>1$ cm) and dark green, a full branch (with one or multiple leaves). Letters indicate  
 601 statistically significant differences (Dunn's multiple comparisons test  $p < 0.05$ ).

602 **Figure 2. Auxin levels in tomato seedlings are affected synergistically by the *self-pruning* (*sp*) and**  
 603 ***diageotropica* (*dgt*) mutations.** (A) Representative 7-day old seedling showing the dissection points for auxin  
 604 quantitation. Free IAA levels in (B) leaves + cotyledons, (C) hypocotyls and (D) roots. Data are mean±s.e.m.  
 605 ( $n=10$ ) Different letters indicate statistically significant differences (Tukey's test,  $p < 0.05$ ) among genotypes.

606 **Figure 3. (A) The *self-pruning* (*sp*) mutation exacerbates defective polar auxin transport in hypocotyls**  
 607 **caused by *diageotropica* (*dgt*).** Basipetal  $^3$ H-IAA transport in 10 mm hypocotyl sections of wild-type (*SP*,  
 608 *DGT*), *SP dgt*, *sp DGT* (cv. Micro-Tom; also the negative control treated with NPA) and double mutant *sp dgt*  
 609 roots. Data are mean±s.e.m. ( $n=10$ ). Asterisk indicates statistically significant differences between treatments

610 (ns, non-significant; \*\* $p \leq 0.05$ ; \*\*\* $p \leq 0.01$ , *t*-test). **(B-E) Vascular patterning in *sp* and *dgt* stems.** Cross-  
611 sections of the fifth internode taken 45 dag. Bar = 100  $\mu$ m. **(F) Vessel density and (G) mean vessel size in *sp***  
612 **and *dgt* stems.** Letters indicate significant differences ( $p < 0.05$  ANOVA, Tukey). **(H) Vessel size**  
613 **distribution in the xylem of *sp* and *dgt* mutants.** The x-axis shows the upper values of cross-sectional area  
614 for each vessel size category. The bars within each category represent a single individual plant ( $n=4$  per  
615 genotype).

616 **Figure 4. Impact of the *self-pruning* (*sp*) mutation on auxin responses in planta. (A) Kinetics of**  
617 **gravitropic response in the shoot.** Shoot angle after placing plants horizontally at time point 0 ( $n=5$ ). **(B)**  
618 **Elongation of excised hypocotyls in response to naphthalenetic acid (NAA).** 6-mm hypocotyl sections  
619 were incubated in the indicated NAA concentration for 24 h before measurement. ( $n=15$ ) **(C-D) Time-course**  
620 **of *in vitro* root elongation of seedlings in control and 10  $\mu$ M NAA-containing MS medium.** ( $n=25$ ). In all  
621 panels, bars indicate s.e.m. and asterisks indicate statistically significant differences between *SP* and *sp* plants  
622 harboring the same *DIAGEOTROPICA* (*DGT*) allele (\* $p \leq 0.05$ ; \*\* $p \leq 0.01$ , *t*-test).

623 **Figure 5. Effects of *SELF-PRUNING* (*SP*) on the auxin signaling and transport machinery in planta.**  
624 **(A) Expression pattern of the GUS reporter driven by the auxin-inducible *DR5* promoter.**  
625 Representative wild-type (*SP*) and mutant (*sp*) seedlings (bar=2 cm) and their root tips (bar=250  $\mu$ m) in the  
626 absence or presence of exogenous auxin (20  $\mu$ M IAA, 3h) 15 dag. **(B-D) Fluorimetric quantification of**  
627 **GUS precipitate.** Seedlings were sampled 15 dag, after treatment with exogenous auxin (20  $\mu$ M IAA, 3h) or  
628 mock. Values are mean  $\pm$  s.e.m ( $n=4$ ). Letters indicate significant differences between genotypes within the  
629 same treatment ( $p < 0.05$  ANOVA, Tukey). **(E-G) Relative gene expression of *PIN* transporters in roots.**  
630 Letters indicate significant differences between genotypes within the same treatment ( $p < 0.05$  ANOVA,  
631 Tukey)

632 **Figure 6. *SELF-PRUNING* (*SP*) and auxin-signaling gene expression is altered by the *diageotropica***  
633 **(*dgt*) mutation. (A) Genomic structure of the *SP* gene in solanaceous species: tomato (*S. lycopersicum*), its**  
634 wild relatives *S. pimpinellifolium* and *S. pennellii* and potato (*S. tuberosum*). The coding sequence is indicated  
635 in yellow (exons, thick bars; introns, thin bars). Red blocks indicate the presence of a conserved or degenerate  
636 auxin-response element (AuxRE), TGTCNC. **Relative transcript accumulation of *SP* (B) and auxin**  
637 **signaling genes (C) in sympodial meristems.** Tissues were sampled from 10d old plants, 24h after 10  $\mu$ M  
638 IAA or mock spray. Letters indicate significant differences between genotypes within the same treatment  
639 ( $p < 0.05$  ANOVA, Tukey). Asterisks indicate significant differences with respect to the wild-type *SP DGT*  
640 ( $p < 0.05$ , *t*-test).

641

## 642 Literature cited

643 Al-Hammadi ASAA, Sreelakshmi Y, Negi S, Siddiqi I, Sharma R (2003) The

- 644 polycotyledon mutant of tomato shows enhanced polar auxin transport. *Plant Physiol*  
645 133: 113–125
- 646 Aloni R (2001) Foliar and axial aspects of vascular differentiation: hypotheses and  
647 evidence. *J Plant Growth Regul* 20: 22-34
- 648 Aloni R (2013) Role of hormones in controlling vascular differentiation and the mechanism  
649 of lateral root initiation. *Planta* 238: 819–830
- 650 Alvarez J, Guli CL, Yu X-H, Smyth DR (1992) terminal flower: a gene affecting  
651 inflorescence development in *Arabidopsis thaliana*. *Plant J* 2: 103–116
- 652 Anfodillo T, Deslauriers A, Menardi R, Tedoldi L, Petit G, Rossi S (2012) Widening of  
653 xylem conduits in a conifer tree depends on the longer time of cell expansion  
654 downwards along the stem. *J Exp Bot* 63:837837a
- 655 Audran-Delalande C, Bassa C, Mila I, Regad F, Zouine M, Bouzayen M (2012) Genome-  
656 wide identification, functional analysis and expression profiling of the Aux/IAA gene  
657 family in tomato. *Plant Cell Physiol* 53: 659–672
- 658 Balbi V, Lomax TL (2003) Regulation of early tomato fruit development by the  
659 *diageotropica* gene. *Plant Physiol* 131: 186–97
- 660 Bargmann BOR, Estelle M (2014) Auxin perception: in the IAA of the beholder. *Physiol*  
661 *Plant* 151: 52–61
- 662 Bartel B, Fink GR (1995) ILR1, an amidohydrolase that releases active indole-3-acetic acid  
663 from conjugates. *Science* 268: 1745–1748
- 664 Benková E, Michniewicz M, Sauer M, Teichmann T, Seifertová D, Jürgens G, Friml J  
665 (2003) Local, efflux-dependent auxin gradients as a common module for plant organ  
666 formation. *Cell* 115: 591–602
- 667 Berleth T, Sachs T (2001) Plant morphogenesis: long-distance coordination and local  
668 patterning. *Curr Opin Plant Biol* 4: 57–62
- 669 Bishop GJ, Nomura T, Yokota T, Harrison K, Noguchi T, Fujioka S, Takatsuto S, Jones  
670 JDG, Kamiya Y (1999) The tomato DWARF enzyme catalyses C-6 oxidation in

- 671 brassinosteroid biosynthesis. *Proc Natl Acad Sci U S A* 96: 1761–1766
- 672 Bishopp A, Help H, El-Showk S, Weijers D, Scheres B, et al. (2011) A mutually inhibitory  
673 interaction between auxin and cytokinin specifies vascular pattern in roots. *Curr Biol*  
674 21:917–926
- 675 Blilou I, Xu J, Wildwater M, Willemsen V, Paponov I, Friml J, Heidstra R, Aida M, Palme  
676 K, Scheres B (2005) The PIN auxin efflux facilitator network controls growth and  
677 patterning in Arabidopsis roots. *Nature* 433: 39–44
- 678 Bradley D, Carpenter R, Copsey L, Vincent C, Rothstein S, Coen E (1996) Control of  
679 inflorescence architecture in *Antirrhinum*. *Nature* 379: 791–797
- 680 Campos ML, Carvalho RF, Benedito VA, Peres LEP (2010) Small and remarkable. The  
681 Micro-Tom model system as a tool to discover novel hormonal functions and  
682 interactions. *Plant Signal Behav* 5: 267-270
- 683 Carvalho RF, Campos ML, Pino LE, Crestana SL, Zsögön A, Lima JE, Benedito VA, Peres  
684 LEP (2011) Convergence of developmental mutants into a single tomato model  
685 system: “Micro-Tom” as an effective toolkit for plant development research. *Plant*  
686 *Methods* 7: 18
- 687 Cary A, Uttamchandani SJ, Smets R, Van Onckelen HA, Howell SH (2001) Arabidopsis  
688 mutants with increased organ regeneration in tissue culture are more competent to  
689 respond to hormonal signals. *Planta* 213: 700–707
- 690 Causier B, Lloyd J, Stevens L, Davies B (2012) TOPLESS co-repressor interactions and  
691 their evolutionary conservation in plants. *Plant Signal Behav* 7: 325–328
- 692 Chandler JW (2016) Auxin response factors. *Plant Cell Environ* 39: 1014–1028
- 693 Cline MG (1994) The role of hormones in apical dominance. New approaches to an old  
694 problem in plant development. *Physiol Plant* 90: 230–237
- 695 Coenen C, Christian M, Lüthen H, Lomax TL (2003) Cytokinin inhibits a subset of  
696 diageotropica-dependent primary auxin responses in tomato. *Plant Physiol* 131: 1692–  
697 1704



- 698 Coenen C, Lomax TL (1998) The diageotropica gene differentially affects auxin and  
699 cytokinin responses throughout development in tomato. *Plant Physiol* 117: 63–72
- 700 Collett CE, Harberd NP, Leyser O (2000) Hormonal interactions in the control of  
701 *Arabidopsis* hypocotyl elongation. *Plant Physiol* 124: 553–562
- 702 Dhonukshe P, Tanaka H, Goh T, Ebine K, Mähönen AP, Prasad K, Blilou I, Geldner N, Xu  
703 J, Uemura T, et al (2008) Generation of cell polarity in plants links endocytosis, auxin  
704 distribution and cell fate decisions. *Nature* 456: 962–966
- 705 Domagalska MA, Sarnowska E, Nagy F, Davis SJ (2010) Genetic analyses of interactions  
706 among gibberellin, abscisic acid, and brassinosteroids in the control of flowering time  
707 in *Arabidopsis thaliana*. *PLoS One* 5: e14012
- 708 Evans LT (1971) Flower induction and the florigen concept. *Annu Rev Plant Physiol* 22:  
709 365–394
- 710 Friml J (2003) Auxin transport — shaping the plant. *Curr Opin Plant Biol* 6: 7–12
- 711 Friml J, Benfey P, Benková E, Bennett M, Berleth T, Geldner N, Grebe M, Heisler M,  
712 Hejácítko J, Jürgens G, et al (2006) Apical-basal polarity: why plant cells don't stand on  
713 their heads. *Trends Plant Sci* 11: 12–14
- 714 Friml J, Wiśniewska J, Benková E, Mendgen K, Palme K (2002) Lateral relocation of auxin  
715 efflux regulator PIN3 mediates tropism in *Arabidopsis*. *Nature* 415: 806–809
- 716 Fujino DW, Nissen SJ, Jones AD, Burger DW, Bradford KJ (1988) Quantification of  
717 indole-3-acetic acid in dark-grown seedlings of the diageotropica and epinastic  
718 mutants of tomato (*Lycopersicon esculentum* Mill.). *Plant Physiol* 88: 780–784
- 719 Gai J, Palmer RG, Fehr WR (1984) Bloom and pod set in determinate and indeterminate  
720 soybeans grown in China. *Agron J* 76: 979
- 721 Gaxiola RA, Palmgren MG, Schumacher K (2007) Plant proton pumps. *FEBS Lett* 581:  
722 2204–2214
- 723 Geldner N, Friml J, Stierhof Y-D, Jürgens G, Palme K (2001) Auxin transport inhibitors  
724 block PIN1 cycling and vesicle trafficking. *Nature* 413: 425–428

- 725 Gendreau E, Traas J, Desnos T, Grandjean O, Caboche M, Hofte H (1997) Cellular basis of  
726 hypocotyl growth in *Arabidopsis thaliana*. *Plant Physiol* 114: 295–305
- 727 Hayashi K (2012) The interaction and integration of auxin signaling components. *Plant Cell*  
728 *Physiol* 53: 965–975
- 729 Hengst U, Albrecht H, Hess D, Monard D (2001) The phosphatidylethanolamine-binding  
730 protein is the prototype of a novel family of serine protease inhibitors. *J Biol Chem*  
731 276: 535–540
- 732 Ivanchenko MG, Zhu J, Wang B, Medvecka E, Du Y, Azzarello E, Mancuso S, Megraw M,  
733 Filichkin S, Dubrovsky JG, et al (2015) The cyclophilin A *DIAGEOTROPICA* gene  
734 affects auxin transport in both root and shoot to control lateral root formation.  
735 *Development* 712–721
- 736 Jefferson RA, Kavanagh TA, Bevan MW (1987) GUS fusions: beta-glucuronidase as a  
737 sensitive and versatile gene fusion marker in higher plants. *EMBO J.* 6: 3901-3907
- 738 Jing H, Yang X, Zhang J, Liu X, Zheng H, Dong G, Nian J, Feng J, Xia B, Qian Q, et al  
739 (2015) Peptidyl-prolyl isomerization targets rice Aux/IAAs for proteasomal  
740 degradation during auxin signalling. *Nat Commun* 6: 7395
- 741 Kelly MO, Bradford KJ (1986) Insensitivity of the diageotropica tomato mutant to auxin.  
742 *Plant Physiol* 82: 713–717
- 743 Kharshiing EV, Kumar GP, Ditengou FA, Li X, Palme K, Sharma R (2010) The  
744 *polycotyledon (pct1-2)* mutant of tomato shows enhanced accumulation of PIN1 auxin  
745 transport facilitator protein. *Plant Biol* 12: 224–228.
- 746 Kojima S, Takahashi Y, Kobayashi Y, Monna L, Sasaki T, Araki T, Yano M (2002) Hd3a,  
747 a rice ortholog of the *Arabidopsis* FT gene, promotes transition to flowering  
748 downstream of Hd1 under short-day conditions. *Plant Cell Physiol* 43: 1096–1105
- 749 Krieger U, Lippman ZB, Zamir D (2010) The flowering gene *SINGLE FLOWER TRUSS*  
750 drives heterosis for yield in tomato. *Nat Genet* 42: 459–463
- 751 Krosalak T, Koch T, Kahl E, Höllt V (2001) Human phosphatidylethanolamine-binding

- 752 protein facilitates heterotrimeric G protein-dependent signaling. *J Biol Chem* 276:  
753 39772–39778
- 754 Kumari S, Roy S, Singh P, Singla-Pareek S, Pareek A (2013) Cyclophilins: Proteins in  
755 search of function. *Plant Signal Behav* 8: e22734
- 756 Lavy M, Prigge MJ, Tigyi K, Estelle M, Ashton NW, Cove DJ, Ashton NW, Grimsley NH,  
757 Cove DJ, Balbi V, et al (2012) The cyclophilin DIAGEOTROPICA has a conserved  
758 role in auxin signaling. *Development* 139: 1115–1124
- 759 Lewis DR, Muday GK (2009) Measurement of auxin transport in *Arabidopsis thaliana*. *Nat*  
760 *Protoc* 4: 437–451
- 761 Li J, Li Y, Chen S, An L (2010) Involvement of brassinosteroid signals in the floral-  
762 induction network of *Arabidopsis*. *J Exp Bot* 61: 4221–4230
- 763 Liao C-Y, Smet W, Brunoud G, Yoshida S, Vernoux T, Weijers D (2015) Reporters for  
764 sensitive and quantitative measurement of auxin response. *Nat Methods* 12: 207–210
- 765 Lifschitz E, Eshed Y (2006) Universal florigenic signals triggered by FT homologues  
766 regulate growth and flowering cycles in perennial day-neutral tomato. *J Exp Bot* 57:  
767 3405–3414
- 768 Ljung K (2013) Auxin metabolism and homeostasis during plant development.  
769 *Development* 140: 943-950
- 770 Ljung K, Bhalerao RP, Sandberg G (2002) Sites and homeostatic control of auxin  
771 biosynthesis in *Arabidopsis* during vegetative growth. *Plant J* 28: 465–474
- 772 MacArthur JW (1934) Linkage groups in the tomato. *J Genet* 29: 123–133
- 773 Marcos D, Berleth T (2014) Dynamic auxin transport patterns preceding vein formation  
774 revealed by live-imaging of *Arabidopsis* leaf primordia. *Front Plant Sci* 5: 235
- 775 Marti E, Gisbert C, Bishop GJ, Dixon MS, Garcia-Martinez JL (2006) Genetic and  
776 physiological characterization of tomato cv. Micro-Tom. *J Exp Bot* 57: 2037–2047
- 777 McGarry RC, Ayre BG (2012) Manipulating plant architecture with members of the CETS  
778 gene family. *Plant Sci* 188–189: 71–81

- 779 Mito N, Bennett AB (1995) The diageotropica mutation and synthetic auxins differentially  
780 affect the expression of auxin-regulated genes in tomato. *Plant Physiol* 109: 293–297
- 781 Molinero-Rosales N, Latorre A, Jamilena M, Lozano R (2004) SINGLE FLOWER TRUSS  
782 regulates the transition and maintenance of flowering in tomato. *Planta* 218: 427–434
- 783 Morita MT (2010) Directional gravity sensing in gravitropism. *Annu Rev Plant Biol* 61:  
784 705–720
- 785 Morris H, Gillingham MAF, Plavcová L, et al. (2017) Vessel diameter is related to amount  
786 and spatial arrangement of axial parenchyma in woody angiosperms. *Plant Cell*  
787 *Environ* <https://doi.org/10.1111/pce.13091>
- 788 Muday G, Lomax T, Rayle D (1995) Characterization of the growth and auxin physiology  
789 of roots of the tomato mutant, diageotropica. *Planta* 195: 548–553
- 790 Murashige T, Skoog F. 1962. A revised medium for rapid growth and bio assays with  
791 tobacco tissue cultures. *Physiologia plantarum* 15, 473:497
- 792 Navarro C, Cruz-Oró E, Prat S (2015) Conserved function of FLOWERING LOCUS T  
793 (FT) homologues as signals for storage organ differentiation. *Curr Opin Plant Biol* 23:  
794 45–53
- 795 Nebenführ A, White TJ, Lomax TL (2000) The diageotropica mutation alters auxin  
796 induction of a subset of the Aux/IAA gene family in tomato. *Plant Mol Biol* 44: 73–84
- 797 Oh K, Ivanchenko MG, White TJ, Lomax TL (2006) The diageotropica gene of tomato  
798 encodes a cyclophilin: a novel player in auxin signaling. *Planta* 224: 133–144
- 799 Ouattara S, Weaver DB (1994) Effect of growth habit on yield and agronomic  
800 characteristics of late-planted soybean. *Crop Sci* 34: 870
- 801 Paciorek T, Zazimalová E, Ruthardt N, Petrásek J, Stierhof Y-D, Kleine-Vehn J, Morris  
802 DA, Emans N, Jürgens G, Geldner N, et al (2005) Auxin inhibits endocytosis and  
803 promotes its own efflux from cells. *Nature* 435: 1251–1256
- 804 Park SJ, Eshed Y, Lippman ZB (2014) Meristem maturation and inflorescence architecture-

- 805           -lessons from the Solanaceae. *Curr Opin Plant Biol* 17: 70–77
- 806    Petrášek J, Friml J (2009) Auxin transport routes in plant development. *Development* 136:
- 807    Pnueli L, Carmel-Goren L, Hareven D, Gutfinger T, Alvarez J, Ganal M, Zamir D,  
808           Lifschitz E (1998) The SELF-PRUNING gene of tomato regulates vegetative to  
809           reproductive switching of sympodial meristems and is the ortholog of CEN and TFL1.  
810           *Development* 125: 1979–1989
- 811    Pnueli L, Gutfinger T, Hareven D, Ben-Naim O, Ron N, Adir N, Lifschitz E (2001) Tomato  
812           SP-interacting proteins define a conserved signaling system that regulates shoot  
813           architecture and flowering. *Plant Cell* 13: 2687–2702
- 814    Ratcliffe OJ, Amaya I, Vincent CA, Rothstein S, Carpenter R, Coen ES, Bradley DJ (1998)  
815           A common mechanism controls the life cycle and architecture of plants. *Development*  
816           125: 1609-1615
- 817    Reinhardt D, Pesce E-R, Stieger P, Mandel T, Baltensperger K, Bennett M, Traas J, Friml  
818           J, Kuhlemeier C (2003) Regulation of phyllotaxis by polar auxin transport. *Nature*  
819           426: 255–260
- 820    Repinski SL, Kwak M, Gepts P (2012) The common bean growth habit gene PvTFL1y is a  
821           functional homolog of Arabidopsis TFL1. *Theor Appl Genet* 124: 1539–1547
- 822    Rice MS, Lomax TL (2000) The auxin-resistant *diageotropica* mutant of tomato responds  
823           to gravity via an auxin-mediated pathway. *Planta* 210: 906–913
- 824    Rick CM (1978) The Tomato. *Sci Am* 239: 76–87
- 825    Rigui AP, Gaspar M, Oliveira VF, Purgatto E, Carvalho MAM de (2015) Endogenous  
826           hormone concentrations correlate with fructan metabolism throughout the  
827           phenological cycle in *Chrysoleaena obovata*. *Ann Bot* 115: 1163–1175
- 828    Rubery PH, Sheldrake AR (1974) Carrier-mediated auxin transport. *Planta* 118: 101–121
- 829    Samach A, Lotan H (2007) The transition to flowering in tomato. *Plant Biotechnol* 24: 71–  
830           82
- 831    Scarpella E (2017) The logic of plant vascular patterning. Polarity, continuity and plasticity

- 832 in the formation of the veins and of their networks. *Curr Opin Genet Dev* 45: 34–43
- 833 Scarpella E, Marcos D, Friml JJ, Berleth T (2006) Control of leaf vascular patterning by  
834 polar auxin transport. *Genes Dev* 20: 1015–1027
- 835 Serrano-Mislata A, Fernández-Nohales P, Doménech MJ, Hanzawa Y, Bradley D,  
836 Madueño F (2016) Separate elements of the TERMINAL FLOWER 1 cis-regulatory  
837 region integrate pathways to control flowering time and shoot meristem identity.  
838 *Development* 143: 3315-3327
- 839 Sestari I, Zsögön A, Rehder GG, Teixeira L de L, Hassimotto NMA, Purgatto E, Benedito  
840 VA, Peres LEP (2014) Near-isogenic lines enhancing ascorbic acid, anthocyanin and  
841 carotenoid content in tomato (*Solanum lycopersicum* L. cv Micro-Tom) as a tool to  
842 produce nutrient-rich fruits. *Sci Hortic* 175: 111–120
- 843 Shalit A, Rozman A, Goldshmidt A, Alvarez JP, Bowman JL, Eshed Y, Lifschitz E (2009)  
844 The flowering hormone florigen functions as a general systemic regulator of growth  
845 and termination. *Proc Natl Acad Sci U S A* 106: 8392–8397
- 846 Shelldrake AR (1974) The polarity of auxin transport in inverted cuttings. *New Phytol* 73:  
847 637–642
- 848 Sibout R, Sukumar P, Hettiarachchi C, Holm M, Muday GK, Hardtke CS (2006) Opposite  
849 root growth phenotypes of *hy5* versus *hy5 hyh* mutants correlate with increased  
850 constitutive auxin signaling. *PloS Genetics* 2:1898-1911
- 851 Sorce C, Giovannelli A, Sebastiani L, Anfodillo T (2013) Hormonal signals involved in the  
852 regulation of cambial activity, xylogenesis and vessel patterning in trees. *Plant Cell*  
853 *Rep* 32:885 in
- 854 Stevens MA, Rick CM (1986) Genetics and Breeding. *In* J Atherton, J Rudich, eds, tomato  
855 *Crop a Sci. basis Improv.* Chapman & Hall, London, pp 35–100
- 856 Su S-H, Gray WM, Masson PH (2015) Auxin: Shape matters. *Nat Plants* 1: 15097
- 857 Takahashi K, Hayashi K -i. K, Kinoshita T (2012) Auxin activates the plasma membrane  
858 H<sup>+</sup>-ATPase by phosphorylation during hypocotyl elongation in Arabidopsis. *Plant*  
859 *Physiol* 159: 632–641

- 860 Takahashi N, Hayano T, Suzuki M (1989) Peptidyl-prolyl cis-trans isomerase is the  
861 cyclosporin A-binding protein cyclophilin. *Nature* 337: 473–475
- 862 Thouet J, Quinet M, Ormenese S, Kinet J-M, Périlleux C (2008) Revisiting the involvement  
863 of *SELF-PRUNING* in the sympodial growth of tomato. *Plant Physiol* 148: 61–64
- 864 Tian Z, Wang X, Lee R, Li Y, Specht JE, Nelson RL, McClean PE, Qiu L, Ma J (2010)  
865 Artificial selection for determinate growth habit in soybean. *Proc Natl Acad Sci U S A*  
866 107: 8563–8568
- 867 Tuominen H, Puech L, Fink S, Sundberg B (1997) A radial concentration gradient of  
868 indole-3-acetic acid is related to secondary xylem development in hybrid aspen. *Plant*  
869 *Phys* 115: 577-585
- 870 Tyburski J, Tretyn A (2004) The role of light and polar auxin transport in root regeneration  
871 from hypocotyls of tomato seedling cuttings. *Plant Growth Regul* 42: 39–48
- 872 Ulmasov T, Liu ZB, Hagen G, Guilfoyle TJ (1995) Composite structure of auxin response  
873 elements. *Plant Cell* 7: 1611–1623
- 874 Vicente MH, Zsögön A, de Sá AFL, Ribeiro R V., Peres LEP (2015) Semi-determinate  
875 growth habit adjusts the vegetative-to-reproductive balance and increases productivity  
876 and water-use efficiency in tomato (*Solanum lycopersicum*). *J Plant Physiol* 177: 11–  
877 19
- 878 Wang Y, Li J (2008) Molecular basis of plant architecture. *Annu Rev Plant Biol* 59: 253–  
879 279
- 880 Weller B, Zourelidou M, Frank L, Barbosa ICR, Fastner A, Richter S, Jürgens G, Hammes  
881 UZ, Schwechheimer C (2017) Dynamic PIN-FORMED auxin efflux carrier  
882 phosphorylation at the plasma membrane controls auxin efflux-dependent growth.  
883 *Proc Natl Acad Sci U S A* 114: E887–E896
- 884 Went FW (1974) Reflections and speculations. *Annu Rev Plant Physiol* 25: 1–27
- 885 Wickland DP, Hanzawa Y (2015) The FLOWERING LOCUS T/TERMINAL FLOWER 1  
886 gene family: functional evolution and molecular mechanisms. *Mol Plant* 8: 983–997

- 887 Yeager AF (1927) Determinate growth in the tomato. *J Hered* 18: 263–265
- 888 Zhang J, Song Q, Cregan PB, Nelson RL, Wang X, Wu J, Jiang G-L (2015) Genome-wide  
889 association study for flowering time, maturity dates and plant height in early maturing  
890 soybean (*Glycine max*) germplasm. *BMC Genomics* 16: 217
- 891 Zhao S, Fernald RD (2005) Comprehensive algorithm for quantitative Real-Time  
892 polymerase chain reaction. *J Comput Biol* 12: 1047–1064
- 893 Zobel RW (1973) Some physiological characteristics of the ethylene-requiring tomato  
894 mutant *diageotropica*. *Plant Physiol* 52: 385–389
- 895 Zobel RW (1974) Control of morphogenesis in the ethylene-requiring tomato mutant,  
896 *diageotropica*. *Can J Bot* 52: 735-741
- 897 Zouine M, Fu Y, Chateigner-Boutin A-LL, Mila I, Frasse P, Wang H, Audran C, Roustan  
898 J-PP, Bouzayen M (2014) Characterization of the tomato ARF gene family uncovers a  
899 multi-levels post-transcriptional regulation including alternative splicing. *PLoS One* 9:  
900 e84203
- 901 Zourelidou M, Absmanner B, Weller B, Barbosa ICR, Willige BC, Fastner A, Streit V, Port  
902 SA, Colcombet J, de la Fuente van Bentem S, et al (2014) Auxin efflux by PIN-  
903 FORMED proteins is activated by two different protein kinases, D6 PROTEIN  
904 KINASE and PINOID. *Elife* 3: e02860
- 905 Zsögön A, Cermak T, Voytas D, Peres LEP (2017) Genome editing as a tool to achieve the  
906 crop ideotype and de novo domestication of wild relatives: Case study in tomato. *Plant*  
907 *Sci* 256: 120–130



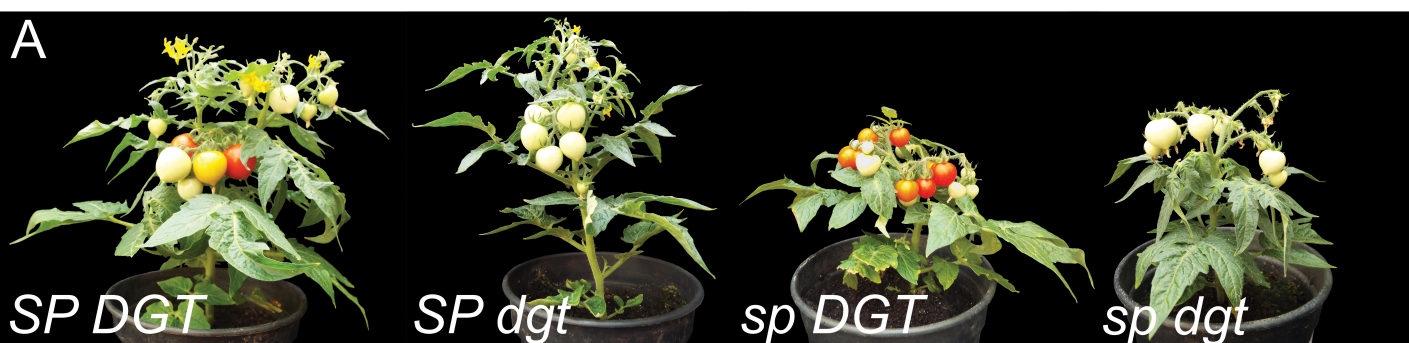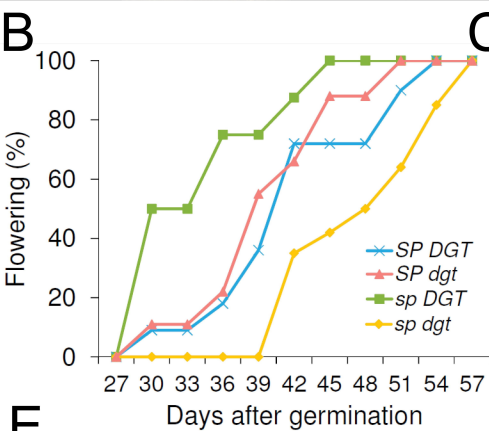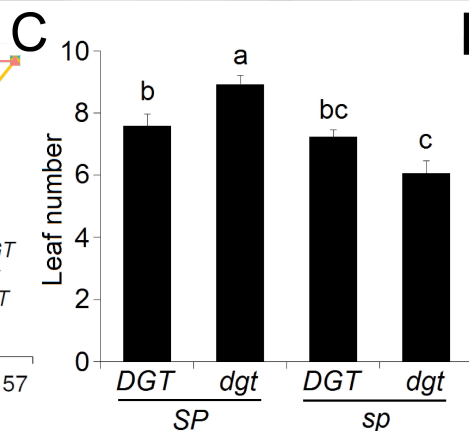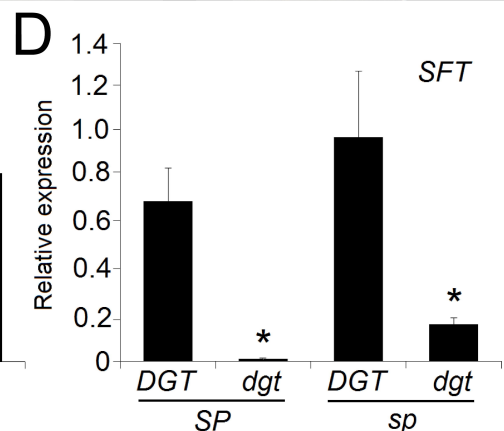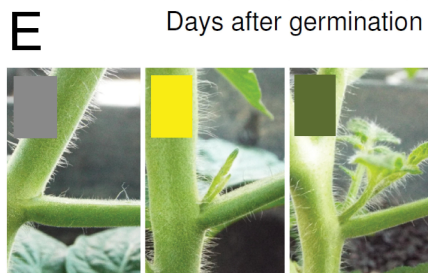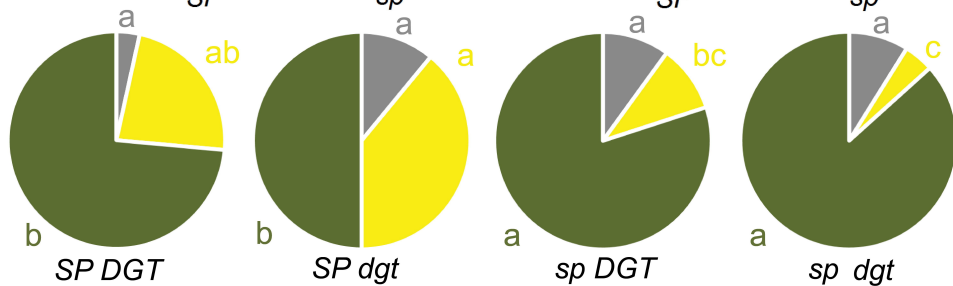

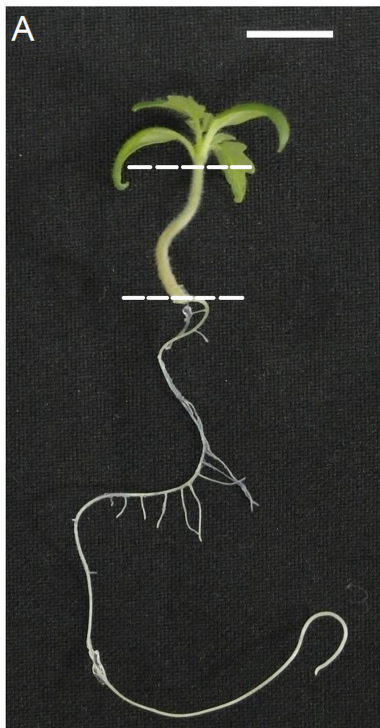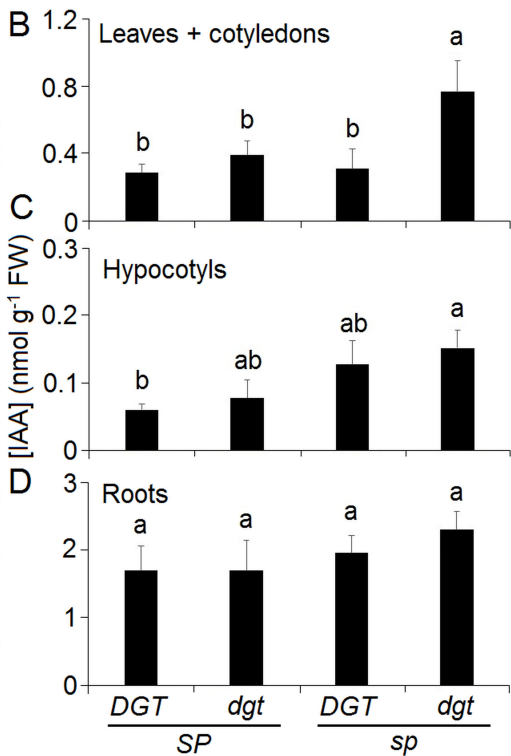

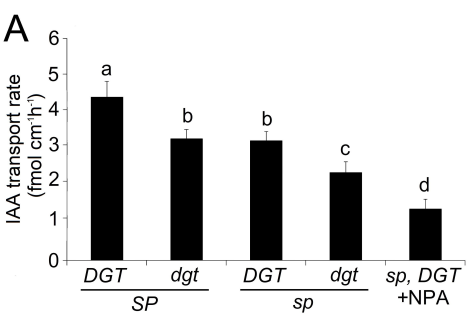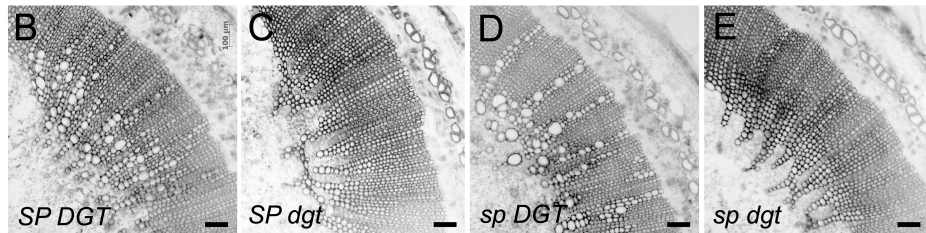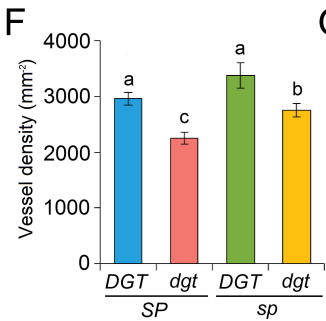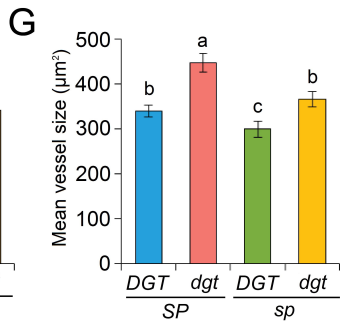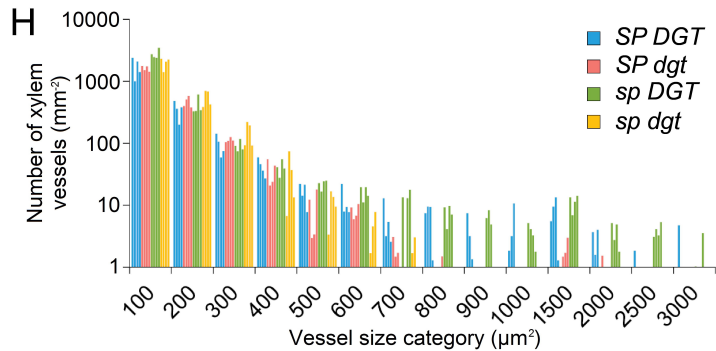

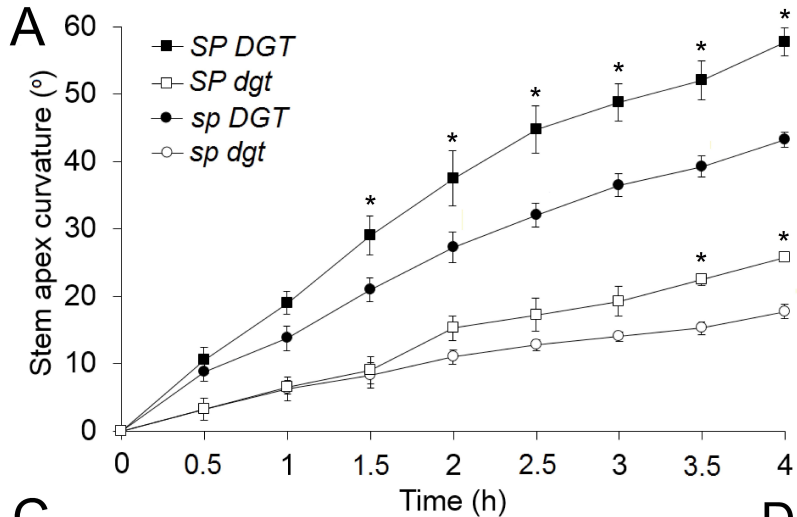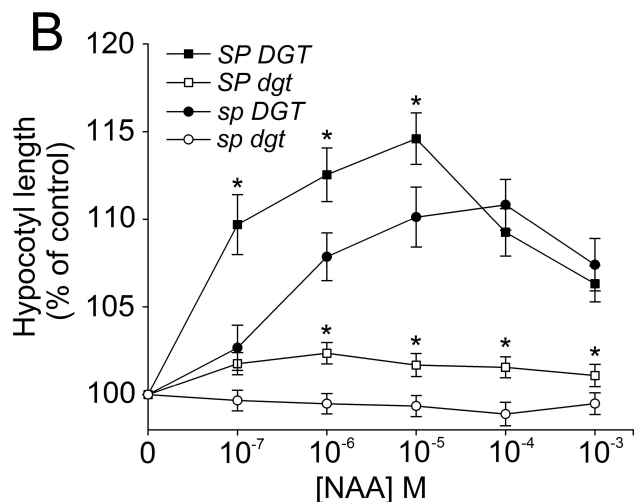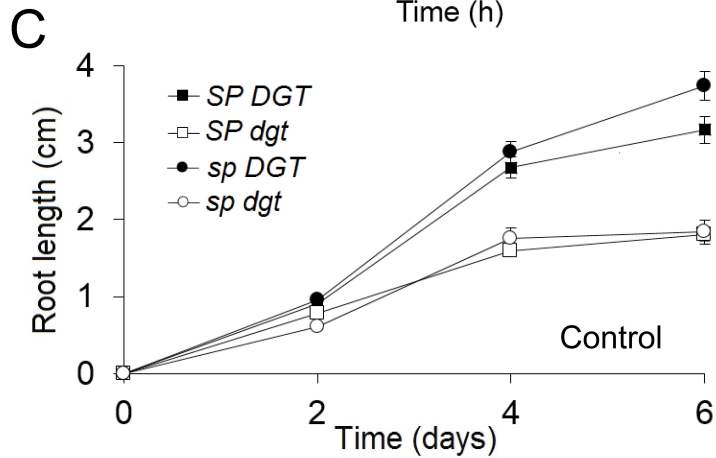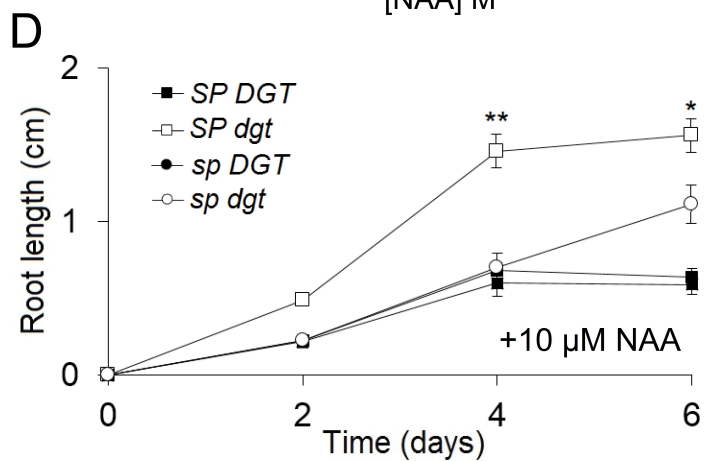

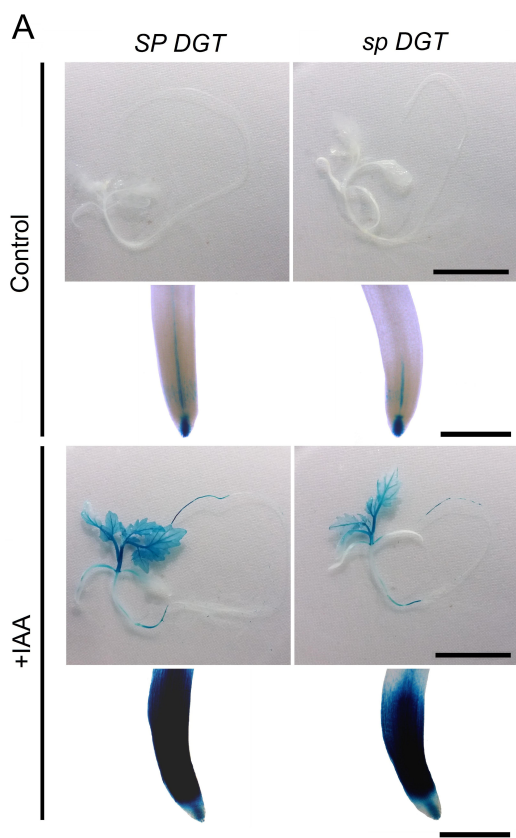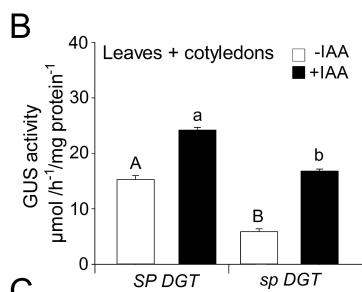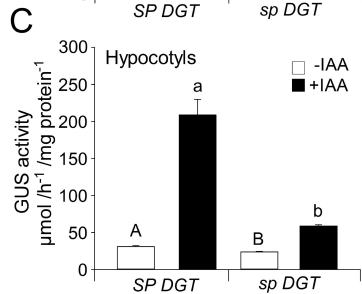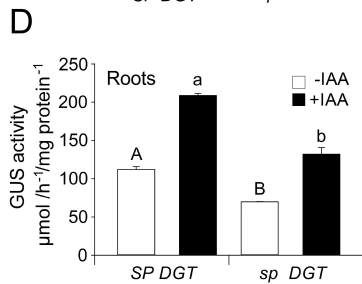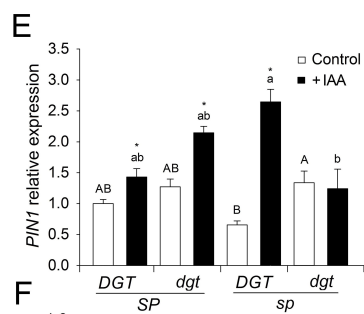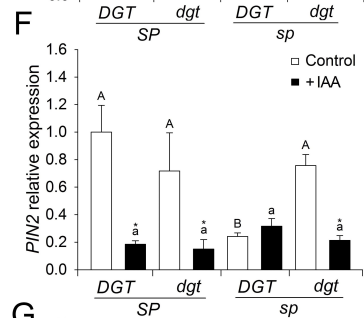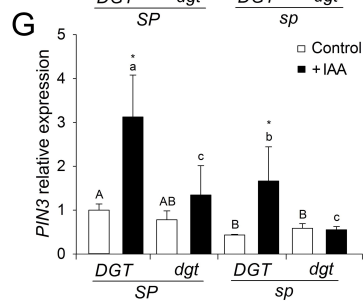

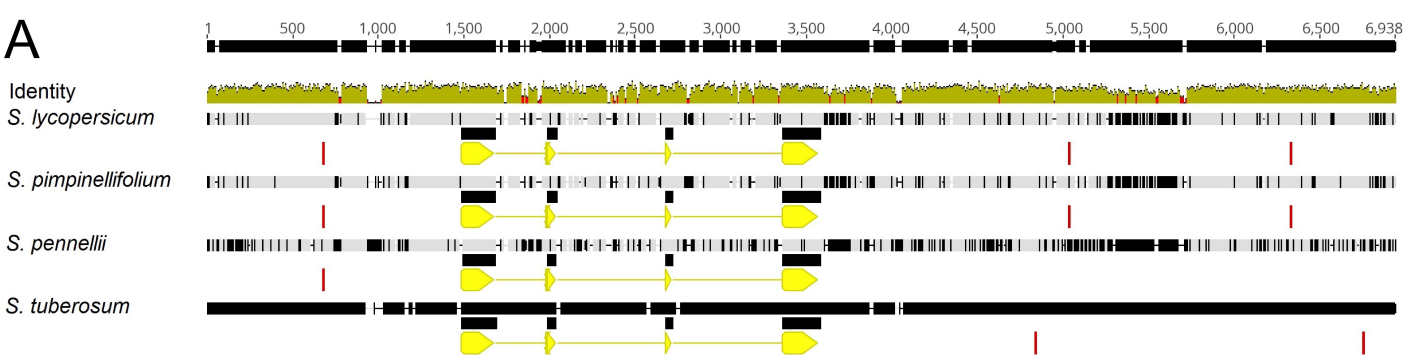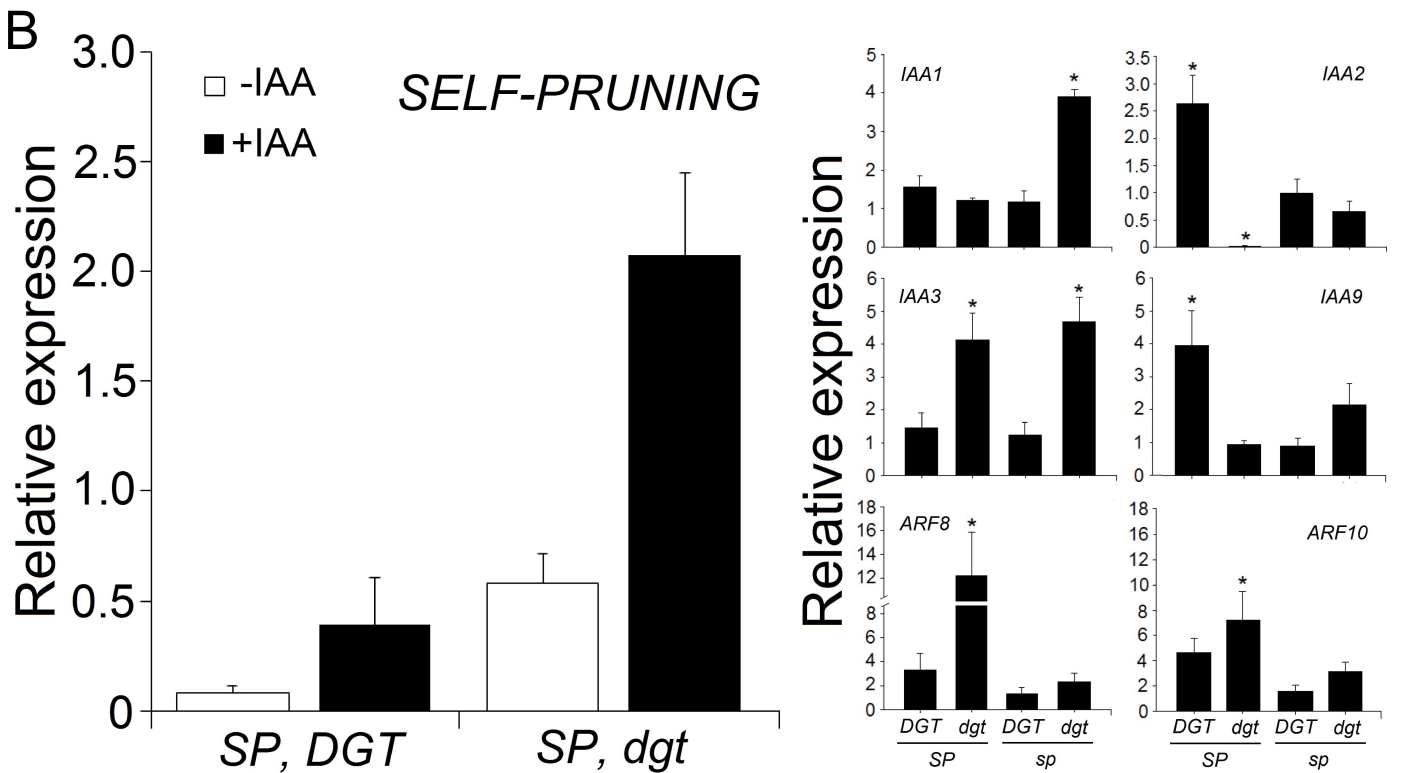

Source: https://www.biorxiv.org/content/10.1101/271387v1.full.pdf
